# Supplementary material for: Activation of MAP3K DLK and LZK in Purkinje cells causes rapid and slow degeneration depending on signaling strength
Source: eLife journal article supplement (doi:10.7554/elife.63509), 2021-01-21
Supplement: fig1-data1 [file elife-63509-fig1-data1-v2.xlsx]

## Sheet: Sheet1
Wild-type	Map3k13KO/KO	PvalbCre/+	PvalbCre/+;Map3k12fl/fl	PvalbCre/+;Map3k13fl/fl	PvalbCre/+;Map3k12fl/fl;Map3k13fl/fl
1086.31	975.475	982.974	1013.98	956.582
1006.73	1005.88	1035.16	962.821	974.252	1022
1041.55	972.83	1012	995.818	1225.69	1034
990.929	1131	1034.54	1048.24	1200.74	1283
983.595	1103.44	1100.41	1005	1004.1	1115
981.874	1129	919.679	947.513	980.273	1223
1058.96	1060.89	972.339	1122.17	1020.94	1141.37
988.077	1045.45	1050.16	1164.61	1102.8	1005
1015.25	1108.91	952.406	944.695	1042.17	1088
