# Supplementary material for: Activation of MAP3K DLK and LZK in Purkinje cells causes rapid and slow degeneration depending on signaling strength
Source: eLife journal article supplement (doi:10.7554/elife.63509), 2021-01-21
Supplement: fig2-data1 [file elife-63509-fig2-data1-v2.xlsx]

## Sheet: Sheet1
Hipp11-DLK(iOE)/+
P5	4.19	4.54	4.42
P6	5.4	5.6	5.5
P8	6.6	6.4	6.2	6.5
P10	6.7	6.1	5.6	6.2	5.3	7	6.2	7.9	6.4	7.6	6.6	6.4
P15	8.5	9.3	8.7	6.4	9.2	8.67	8.67	9.26
P21	14.65	13.4	12.8	12.96	13.4	11.8	12.13	11.66	11.55	11.36
PvalbCre/+;Hipp11-DLK(iOE)/+
P5	2.52	3.94	3.83	4.04	3.96
P6	4.4	4.2	4	3.4	2.8	4
P8	4.9	5	5.1	5.4
P10	2.8	3.2	3.4	4.6	4.5	2.46	2.9	4.9	5	5.1	5.4
P15	4.1	4	3.78	5.64	6.5	6.85	6.47	6.65	6.5
P21	5.4	4.6	6.2	6.2	6.1	5.8	4.42	4.11	4.83	4.76
