# Supplementary material for: Activation of MAP3K DLK and LZK in Purkinje cells causes rapid and slow degeneration depending on signaling strength
Source: eLife journal article supplement (doi:10.7554/elife.63509), 2021-01-21
Supplement: fig2-data2 [file elife-63509-fig2-data2-v2.xlsx]

## Sheet: Sheet1
Hipp11-DLK(iOE)/+
P5	2.59434	1.65729	3.12698	1.75851	2.28317	2.53496	1.8901	1.82271	1.98839
P10	4.83764	5.29309	5.18944	4.90292	4.98663	5.19547	4.76949	4.89449	4.15994
P15	5.79407	6.94984	7.25943	7.25471	6.92234	6.80746	6.4796	6.1876	6.91343
P21	8.06198	10.5074	8.15426	7.60164	7.38618	6.06178	7.20607	7.26896	7.67717
PvalbCre/+;Hipp11-DLK(iOE)/+
P5	1.89995	2.15831	2.6744	3.18891	2.16968	3.14993	2.70535	1.91548	2.23948
P10	3.52889	4.63605	4.51179	3.86802	4.36702	4.20517	4.06525	4.54199	3.49318
P15	3.76267	3.76516	4.44079	3.74364	3.71896	3.3907	4.14029	3.98441	3.93163
P21	2.74017	1.94481	1.90073	2.02752	1.89994	2.30158	2.32154	2.24753	2.2393
