# Supplementary material for: Activation of MAP3K DLK and LZK in Purkinje cells causes rapid and slow degeneration depending on signaling strength
Source: eLife journal article supplement (doi:10.7554/elife.63509), 2021-01-21
Supplement: fig2-data3 [file elife-63509-fig2-data3-v2.xlsx]

## Sheet: Sheet1
Hipp11-DLK(iOE)/+
P5	809	1073	804	1095	1083	1052	863	903	1038
P10	909	1049	1007	973.746	1034.98	1107.51	957	1078	948
P15	1064	1294	1155	1000	1010	1026	1052	1123	1084
P21	996.583	1017.8	1175.69	1065.46	1229.79	1050.44	1066.18	1024.63	882.053
PvalbCre/+;Hipp11-DLK(iOE)/+
P5	705	802	1178	1139	994	1185	1152	1089	982
P10	627	574	779	625	653	633	626	662	640
P15	209	242	266	186	231	166	188	153	243
P21	25	14	24	2	6	30	43	21	28
