# Supplementary material for: Activation of MAP3K DLK and LZK in Purkinje cells causes rapid and slow degeneration depending on signaling strength
Source: eLife journal article supplement (doi:10.7554/elife.63509), 2021-01-21
Supplement: fig3-data1 [file elife-63509-fig3-data1-v2.xlsx]

## Sheet: Sheet1
	Hipp11-DLK(iOE)/+	PvalbCre/+;Hipp11-DLK(iOE)/+
	0	5.31915
	0	3.0426
	0	4.78261
	0	6.55527
	0	5.83265
	0	3.57097
	0	5.52749
	0	4.83275
	0	4.33847
