# Supplementary material for: Activation of MAP3K DLK and LZK in Purkinje cells causes rapid and slow degeneration depending on signaling strength
Source: eLife journal article supplement (doi:10.7554/elife.63509), 2021-01-21
Supplement: fig3-data2 [file elife-63509-fig3-data2-v2.xlsx]

## Sheet: Sheet1
	Hipp11-DLK(iOE)/+	PvalbCre/+;Hipp11-DLK(iOE)/+
	0	6.94143
	0	7.18954
	0	6.90377
	0	9.46502
	0	8.13008
	0	12.0438
	0	11.5646
	0	7.14286
	0	8.82783
