# Supplementary material for: Activation of MAP3K DLK and LZK in Purkinje cells causes rapid and slow degeneration depending on signaling strength
Source: eLife journal article supplement (doi:10.7554/elife.63509), 2021-01-21
Supplement: fig3-data4 [file elife-63509-fig3-data4-v2.xlsx]

## Sheet: Sheet1
	P15 dendrite swelling+ PCs/total PCs
		Hipp11-DLK(iOE)/+	PvalbCre/+;Hipp11-DLK(iOE)/+
		0	5.42299
		0	5.88235
		0	7.53138
		0	11.9342
		0	12.1951
		0	13.5036
		0	13.2653
		0	11.1554
		0	10.2662
	P15 dendrite swelling+c-caspase3+ PCs/total PCs
		Hipp11-DLK(iOE)/+	PvalbCre/+;Hipp11-DLK(iOE)/+
		0	3.47072
		0	4.3573
		0	4.1841
		0	7.81893
		0	6.50407
		0	8.0292
		0	9.86395
		0	7.17131
		0	7.60456
