# Supplementary material for: Activation of MAP3K DLK and LZK in Purkinje cells causes rapid and slow degeneration depending on signaling strength
Source: eLife journal article supplement (doi:10.7554/elife.63509), 2021-01-21
Supplement: fig4-data4 [file elife-63509-fig4-data4-v2.xlsx]

## Sheet: Sheet1
	Hipp11-LZK(iOE)/+
	P10	0	0	0	0	0	0	0	0	0
	P60	0	0	0	0	0	0	0	0	0
	P90	0	0	0	0	0	0	0	0	0
	P120	0	0	0	0	0	0	0	0	0
	PvalbCre/+;Hipp11-LZK(iOE)/+
	P10	0.474496	0.444939	0.618812	0.526316	0.323974	0.4	0.510204	0.409417	0.299401
	P60	0.696056	0.241755	0.251889	0.296736	0.491803	0.299401	0.431965	0.23753	0.214133
	P90	0.255102	0	0.471698	0.395257	0.3663	0.390625	0.636943	0.510204	0
	P120	2.07715	0.879765	1.94444	0.680272	1.26582	1.22249	1.47872	0.792557	1.14943
