# Supplementary material for: Activation of MAP3K DLK and LZK in Purkinje cells causes rapid and slow degeneration depending on signaling strength
Source: eLife journal article supplement (doi:10.7554/elife.63509), 2021-01-21
Supplement: fig5-data3 [file elife-63509-fig5-data3-v2.xlsx]

## Sheet: Sheet1
PvalbCre/+
P30	0	0	0	0	0	0	0	0
P45	0	0	0	0	0	0	0	0	0	0	0	0	0	0	0	0	0
P60	0	0	0	0.333333	0	0	0	0	0	0	0	0	0	0	0	0	0	0	0	0	0	0	0
P75	0	0	0	0	0	0.333333	0	0	0.333333	0	0	0	0	0	0	0	0	0	0
P90	0	0	0	0	0	0	0	0	0	0	0	0	0	0	0	0	0	0	0	0	0	0
P105	0	0	0	0	0	0	0	0	0	0	0	0
P120	0	0	0	0	0	0	0.666667	0	0	0	0	0
PvalbCre/+;Celf2fl/fl
P30	0	0	0	0	0
P45	0	0	0	0	0	0	0	0
P60	0	0	0	0	0	0	0
P75	0	0	0	0	0	0
P90	0	0	0	0
P105	0	0	0	0
P120	0	0	0	0	0
PvalbCre/+;Hipp11-LZK(iOE)/+
P30	0.333333	0.333333	0.333333	0.333333	0.333333	0.333333	0.333333	0.666667	0.333333	1	1	1	1	1	1	1	2	2	1	1	1
P45	1	2	1	2	1	1	1
P60	0.666667	1.33333	1	1.66667	1	1	0.666667	0.333333	2	2	2	2	1	1	1.66667	1.33333	2	2	1.66667	2
P75	2	2	2	2	2	2	2	2	1	0.666667	1	1	1	0.666667	1
P90	1.66667	1.33333	1.33333	1.66667	0.666667	1.66667	1.33333	1.33333	2	2	2	2	2	2	2	2	2	1	2	2	1.66667	1.33333	0.666667	2	1.33333	1.33333
P105	1.66667	0.666667	1	1	1.33333	2	2	2	2	2	2	2	2	2	2	2	2	1
P120	2	2	2	2	2	2	2	2	2	2	2	1	2	2	2	2	2	2	2
PvalbCre/+;Celf2fl/fl;Hipp11-LZK(iOE)/+
P30	0.666667	0.666667	1	0	0
P45	0	0.666667	1	1	0	0.333333	0.333333	0.666667
P60	0	0	0.333333	0.333333	0.333333	0.333333	0.666667	1	0.333333	0	0.666667
P75	0.333333	0.333333	0.333333	0	0.333333	0	0.333333	0.333333	0.333333	0	0.333333
P90	0.333333	0.333333	0.333333	0.333333	0	0.333333	0.333333	0	0.333333	0	0	1	0.333333
P105	0.333333	0.333333	0.333333	0	0.333333	0.333333	1	1
P120	0.666667	0	1	0.666667	0.333333	1	1	0.666667
