# Supplementary material for: Activation of MAP3K DLK and LZK in Purkinje cells causes rapid and slow degeneration depending on signaling strength
Source: eLife journal article supplement (doi:10.7554/elife.63509), 2021-01-21
Supplement: fig5-data5 [file elife-63509-fig5-data5-v2.xlsx]

## Sheet: Sheet1
PvalbCre/+
P30	0	0	0	0	0	0	0	0
P45	0	0	0	0	0	0	0	0	0	0	0	0	0	0	0	0	0
P60	0	0	0	3.66667	0	0	0	0	0	0	0	0	0	0	0	0	0	0	0	0	0	0	0
P75	0	0	0	0	0	2.33333	0	0	1.33333	0	0	0	0	0	0	0	0	0	0
P90	0	0	0	0	0	0	0	0	0	0	0	0	0	0	0	0	0	0	0	0	0	0
P105	0	0	0	0	0	0	0	0	0	0	0	0
P120	0	0	0	0	0	0	4.66667	0	0	0	0	0
PvalbCre/+;Celf2fl/fl
P30	0	0	0	0	0
P45	0	0	0	0	0	0	0	0
P60	0	0	0	0	0	0	0
P75	0	0	0	0	0	0
P90	0	0	0	0
P105	0	0	0	0
P120	0	0	0	0	0
PvalbCre/+;Hipp11-LZK(iOE)/+
P30	6.33333	5.66667	5.33333	6	6	5.66667	5.33333	5	5	3.66667	5	5	5.33333	4	5	4	7.33333	8	6.66667	6.66667	6
P45	6.33333	7	6	7	6	6	6
P60	6	6.33333	5	6.33333	5.66667	6	5	4.66667	6.33333	7	6	6.66667	6	6	6	6.33333	7.66667	7	6.66667	7
P75	7.33333	6.66667	6.66667	7	7.33333	7.66667	7	6.33333	6	5	5	5.33333	4.33333	5	8	6	6.66667	6.33333	6	6	6
P90	8	6.33333	6	7.66667	6.33333	6.66667	6.66667	6	7	7	7	7	7	7	7	9.33333	9.66667	7.66667	8	9	6.33333	7.66667	5.66667	7.33333	6.08333	6.66667
P105	7.33333	5.66667	6.33333	6.66667	5.33333	7.33333	7	7	7	7	7	10	8.66667	9	8	9	8	9.66667
P120	7.66667	7.66667	7.83333	8	6	8	7	7	7.33333	8	7	3	9.33333	9.33333	8.33333	10	10	9	10
PvalbCre/+;Celf2fl/fl;Hipp11-LZK(iOE)/+
P30	3	3.66667	3.66667	1	2
P45	4.33333	4.66667	4	4	2.66667	3.66667	3.66667	3
P60	2.66667	2.33333	3.66667	3.83333	2.16667	4.33333	4.66667	4	3.33333	0	3.66667
P75	3.33333	2.33333	2.33333	3.33333	1.33333	0	3.66667	3.66667	4	0	5.33333
P90	4.66667	3	3.66667	4.66667	3.33333	2.66667	5	0	1.66667	0	0	4.66667	4
P105	4.16667	4.33333	4.33333	0	4.66667	6.33333	5	5
P120	4.83333	0	4.66667	5	4.66667	7.66667	5.33333	4.66667
