# Supplementary material for: Activation of MAP3K DLK and LZK in Purkinje cells causes rapid and slow degeneration depending on signaling strength
Source: eLife journal article supplement (doi:10.7554/elife.63509), 2021-01-21
Supplement: fig5-data7 [file elife-63509-fig5-data7-v2.xlsx]

## Sheet: Sheet1
	PvalbCre/+	PvalbCre/+;Celf2fl/fl	PvalbCre/+;Hipp11-LZK(iOE)/+	PvalbCre/+;Celf2fl/fl;Hipp11-LZK(iOE)/+
	1047	1004	405.755	886
	1160	972	378.522	1060
	1127	935	435	976
	1004	926.566	335	881
	903	912.934	335	983.301
	966	941.5	336	756
	943.286	1053.03	441	833
	973.685	1077	395	941
	1051.49	990.265	409	970
