# Supplementary material for: Activation of MAP3K DLK and LZK in Purkinje cells causes rapid and slow degeneration depending on signaling strength
Source: eLife journal article supplement (doi:10.7554/elife.63509), 2021-01-21
Supplement: fig6-data1 [file elife-63509-fig6-data1-v2.xlsx]

## Sheet: Sheet1
	PvalbCre/+	PvalbCre/+;Celf2fl/fl	PvalbCre/+;Hipp11-LZK(iOE)/+	PvalbCre/+;Celf2fl/fl;Hipp11-LZK(iOE)/+
	-0.09667	0.155222	21.716	52.244
	-0.24867	0.155222	39.883	29.058
	1.22533	0.401222	27.465	30.876
	-0.12567	0.295222	70.587	19.793
	2.47133	2.26322	76.052	36.76
	0.068333	3.24422	61.208	45.281
	0.365333	2.92822	72.431	33.39
	-0.18267	1.80322	13.18	52.585
	-0.47767	3.06522	52.662	46.565
	0.032333	0.964222	14.405	41.24
	-0.46067	2.05122	30.53	31.359
	-0.25167	0.997222	28.034	29.42
	-0.14667	1.94722	56.742	10.054
	-0.25167	1.56222	13.364	18.873
	0.122333	0.226222	24.982	64.095
	-0.56367	0.087222	56.054	17.055
	-0.66867	-0.159778	46.19	23.234
	-0.58067	3.20622	40.049	24.653
	-0.59867	0.015222	20.792	26.753
	4.12433	3.31222	80.938	30.41
	-0.66867	2.26022	38.047	27.19
	-0.66867	0.542222	91.463	22.629
	-0.61667	1.20822	91.364	29.153
	-0.66867	2.15722	77.268	23.366
	-0.42367	0.296222	69.369	15.977
	-0.51167	0.402222	51.777	40.809
	-0.63467	0.155222	36.337	24.821
	1.41933	1.31722	54.84	57.406
	-0.61767	0.402222	57.354	28.565
	-0.40667	0.577222	29.779	10.566
	0.593333	-0.159778	60.657	20.262
	0.292333	-0.159778	20.682	27.456
	1.60933	0.015222	29.46	17.168
	-0.19667	0.191222	38.46	8.697
	-0.04167	0.051222	55.527	15.088
	-0.04167	0.191222	38.807	16.923
	-0.34267	1.24422	13.124	51.879
	0.713333	1.55922	72.233	35.795
	-0.44167	1.83722	21.779	45.317
	2.60633	0.508222	46.693	33.58
	0.670333	-0.125778	74.412	68.584
	0.363333	0.613222	86.866	48.393
	-0.30467	0.154222	66.405	34.872
	9.06133	0.715222	68.844	22.353
	-0.52867	7.24422	69.149	30.351
	-0.47567	2.08822	96.24	23.238
	-0.28267	1.45622	76.665	34.277
	-0.58367	1.77122	54.552	18.658
	-0.45967	0.363222	53.791	22.968
	-0.46367	-0.054778	52.902	16.771
	4.01833	-0.089778	73.275	31.336
	-0.00767	-0.125778	63.858	45.074
	-0.51167	0.191222	70.319	15.238
	-0.40967	-0.019778	51.903	30.955
	0.365333	0.717222	46.76	26.758
	-0.61667	6.08922	55.715	12.818
	17.0693	2.05222	73.587	11.112
	0.275333	0.436222	47.997	17.322
	-0.44267	4.79222	73.653	20.078
	-0.44167	5.80822	14.098	17.241
	-0.59867	1.70022	34.22	21.114
	-0.35467	4.75722	17.635	9.562
	0.376333	4.82622	90.286	14.226
	0.751333	2.96722	15.201	19.521
	-0.09167	1.94722	33.358	33.273
	1.27933	0.859222	19.669	12.534
	-0.07267	0.438222	18.573	12.972
	0.065333	3.56222	12.492	24.441
	1.06533	4.85822	15.352	21.941
	-0.02267	4.12122	12.033	65.865
	-0.51467	0.823222	7.094	57.858
	0.432333	3.24922	12.432	39.836
	0.135333	0.472222	22.573	35.683
	-0.21167	2.15722	37.091	8.656
	0.415333	2.26322	20.672	8.773
	1.78833	3.59522	14.489	45.596
	8.71933	2.64922	41.158	26.011
	1.07233	2.43622	52.24	20.99
	3.48933	1.87622	34.584	47.537
	0.203333	0.963222	32.784	38.945
	1.76233	1.66422	43.854	48.623
	0.677333	6.71722	10.507	59.266
	-0.10967	0.577222	40.095	24.003
	1.64033	1.38722	37.609	28.708
	0.371333	1.56022	70.819	31.481
	0.295333	2.79022	77.011	26.125
	-0.49367	1.38522	21.562	42.016
	-0.37367	0.260222	66.804	22.702
	-0.28267	0.613222	37.457	16.733
	-0.46067	-0.159778	64.146	19.213
	1.01433	-0.089778	26.285	25.547
	-0.09167	0.296222	33.806	10.26
	0.065333	0.330222	27.941	20.565
	1.02533	-0.159778	29.14	42.309
	0.382333	-0.159778	20.288	36.763
	3.40333	0.260222	44.121	43.131
	0.302333	1.56022	47.24	39.439
	0.971333	0.015222	38.69	23.747
	0.046333	0.508222	37.344	37.384
	0.277333	0.190222	29.313	40.427
	0.014333	0.541222	23.362	24.982
	0.645333	1.80422	19.815	50.756
	2.78733	1.17222	45.693	32.124
	-0.46067	-0.159778	35.011	58.793
	-0.51267	0.613222	32.384	39.186
	-0.14767	0.191222	32.792	53.231
	0.678333	0.928222	39.891	48.147
	0.098333	0.333222	36.204	23.353
	-0.07267	-0.159778	22.722	31.375
	-0.19667	0.121222	32.259	41.526
	0.751333	0.508222	9.184	46.811
	0.525333	-0.159778	25.946	66.982
	0.890333	4.08922	9.828	71.919
	-0.19467	4.12022	13.132	67.93
	3.13033	0.613222	34.051	31.499
	1.76633	1.56222	28.596	55.653
	-0.02367	1.31522	36.233	69.346
	0.186333	2.26022	52.412	43.709
	1.71433	2.96122	73.478	22.49
	0.343333	6.90122	42.728	44.052
	-0.55067	0.191222	30.483	43.388
	0.286333	0.930222	62.467	43.842
	0.802333	0.542222	66.891	67.646
	0.821333	0.578222	44.183	24.576
	-0.66867	3.87922	29.322	27.419
	-0.61667	1.06922	32.834	52.179
	-0.31767	2.36622	23.357	37.357
	2.80933	1.17322	36.449	32.829
	-0.44167	4.01922	52.356	45.304
	-0.65167	0.892222	72.824	31.04
	-0.47767	0.610222	61.237	44.242
	-0.52967	0.646222	56.971	34.825
	0.436333	0.789222	78.436	72.134
	8.56533	1.06722	64.887	37.565
	-0.51267	-0.125778	38.282	48.708
	-0.30067	0.154222	45.464	50.153
	-0.24867	1.06922	20.634	54.439
	-0.61667	-0.054778	22.186	53.73
	-0.59967	-0.159778	43.287	19.269
	-0.35367	0.471222	48.613	18.814
	-0.56367	0.402222	63.162	29.5
	-0.56367	1.48922	56.728	30.023
	-0.19767	1.31522	66.164	32.771
	-0.51467	1.77422	16.523	29.503
	-0.22967	0.578222	20.304	42.201
	0.594333	0.964222	12.475	22.981
	-0.51267	-0.159778	32.185	42.347
	0.277333	1.70122	68.332	15.877
	-0.63467	1.17222	43.083	24.295
	-0.00067	2.15822	51.823	32.935
	-0.47767	2.82122	48.526	26.839
	-0.47567	1.10322	30.126	33.187
	-0.52867	4.68322	26.599	13.226
	-0.56367	2.50722	46.824	41.753
	-0.24967	2.16022	38.038	20.921
	0.297333	0.964222	58.304	62.624
	0.140333	1.45422	18.325	30.35
	-0.30067	3.70122	22.593	29.281
	-0.43967	2.54122	21.512	31.248
	-0.44167	-0.159778	34.928	26.729
	-0.07267	2.30022	55.356	29.161
	1.73633	0.438222	51.328	18.145
	2.11833	0.366222	44.076	18.521
	0.783333	2.37022	51.478	49.165
	2.03133	-0.159778	60.147	51.382
	-0.58167	0.998222	63.873	47.613
	0.835333	0.438222	61.296	45.452
	0.823333	0.753222	33.133	46.735
	1.55733	2.43922	36.037	42.025
	1.89233	1.73822	28.406	71.792
	1.01333	6.79622	30.228	32.961
	-0.05467	0.224222	24.153	26.824
	-0.63567	1.80622	43.928	5.442
	-0.30667	1.59222	46.036	25.285
	2.32433	1.70122	32.407	15.722
	-0.01867	1.59622	50.195	19.724
	-0.23067	-0.089778	72.163	17.992
	1.87233	-0.159778	91.502	6.457
	1.52133	-0.019778	83.447	15.861
	0.188333	-0.159778	86.333	12.186
	0.436333	0.683222	78.868	9.233
	-0.05467	-0.159778	31.046	17.096
	0.379333	1.17622	26.934	32.16
	1.33033	2.26322	57.447	9.738
	0.292333	0.717222	36.181	11.38
	0.295333	0.998222	42.435	19.037
	1.66333	0.121222	27.566	24.935
	1.25833	1.03622	32.133	28.723
	2.17533	0.438222	63.034	41.547
	0.170333	-0.054778	48.863	19.464
	1.10833	-0.159778	33.748	7.328
	2.33733	0.191222	22.154	8.379
	0.005333	0.157222	34.321	18.875
	1.91533	0.191222	55.721	15.229
	2.28733	-0.159778	46.572	10.437
	0.393333	-0.125778	44.233	19.855
	2.23733	1.80822	31.383	10.868
	0.944333	7.99022	62.142	12.825
	1.62733	0.016222	45.173	14.037
	0.097333	0.121222	30.778	13.982
	2.17133	0.611222	48.264	27.033
	-0.31767	0.366222	45.833	7.734
	-0.45967	-0.089778	37.593	13.219
	-0.05667	-0.125778	55.604	6.47
	-0.13967	0.227222	30.948	7.18
	0.046333	-0.054778	36.772	9.044
	0.297333		35.402	9.355
	-0.12867			24.05
	0.491333			4.453
	-0.42167			7.698
	-0.60267			16.528
	0.820333			7.15
	0.491333			11.613
	0.207333			16.065
	0.593333			12.589
	0.082333			13.552
	-0.40667			11.417
	0.314333			30.799
	0.279333			44.899
	-0.37067			12.196
	0.226333			9.264
	1.52133			19.423
	1.46733			45.016
	0.823333			31.961
	-0.35567			25.156
	1.24433			17.412
	-0.35367			36.979
	0.627333			53.156
	0.275333			45.074
	0.346333			23.325
	-0.01967			29.726
	0.033333			16.654
	0.857333			14.888
	-0.21267			29.37
	0.642333			24.576
	0.188333			34.755
	0.065333			43.128
	0.911333			65.481
	1.26233			27.629
	-0.42167			9.231
	0.999333			43.882
	-0.19467			32.629
	-0.59867			21.731
	0.573333			11.025
	-0.56367			10.658
	0.645333			33.197
				18.289
				10.42
				13.224
				7.001
				5.68
				7.136
				13.259
				15.036
				6.288
				10.253
				7.313
				4.541
				19.443
				13.481
				7.179
				25.244
				41.587
				25.864
				22.255
				24.563
				4.01
				19.846
				15.033
				36.39
				4.724
				14.701
				16.383
				29.537
				28.966
				11.986
				23.82
				12.397
				26.211
				29.85
				22.445
				8.753
				14.96
				14.791
				35.53
				14.824
				34.605
				29.594
				6.544
				7.468
				48.077
				29.629
				25.409
				13.697
				20.461
				9.138
				14.482
				14.354
				19.745
				5.635
				16.585
				2.791
				27.938
				22.143
				32.124
				23.634
				31.175
				23.478
				19.791
				48.813
				50.489
				48.182
				31.898
				20.635
				46.028
				60.252
				25.388
				28.224
				23.08
				36.292
				32.64
				18.825
				33.408
				54.386
				43.89
				66.118
				52.382
				48.588
				25.701
				66.806
				44.614
				21.835
				50.474
				35.317
				16.854
				37.983
				32.606
				12.446
				14.412
				29.058
				82.22
				64.972
				60.402
				45.868
				40.313
				56.869
				5.007
				8.594
				7.241
				8.573
				35.832
				18.55
				26.917
				84.452
				14.331
				19.862
				21.029
				19.559
				53.592
				24.135
				19.916
				49.722
				56.092
				63.164
				63.826
				82.138
				48.518
				27.606
				45.861
				48.99
				55.138
				62.709
				34.893
				30.782
				28.855
				82.961
				33.043
				34.782
				35.326
				7.415
