# Supplementary material for: Activation of MAP3K DLK and LZK in Purkinje cells causes rapid and slow degeneration depending on signaling strength
Source: eLife journal article supplement (doi:10.7554/elife.63509), 2021-01-21
Supplement: fig6-data2 [file elife-63509-fig6-data2-v2.xlsx]

## Sheet: Sheet1
	PvalbCre/+	PvalbCre/+;Celf2fl/fl	PvalbCre/+;Hipp11-LZK(iOE)/+	PvalbCre/+;Celf2fl/fl;Hipp11-LZK(iOE)/+
	0	0	2.07715	0
	0	0	0.879765	0
	0	0	1.94444	0.102459
	0	0	0.680272	0
	0	0	1.26582	0
	0	0	1.22249	0
	0	0	1.47872	0.120048
	0	0	0.792557	0
	0	0	1.14943	0
