# Supplementary material for: Activation of MAP3K DLK and LZK in Purkinje cells causes rapid and slow degeneration depending on signaling strength
Source: eLife journal article supplement (doi:10.7554/elife.63509), 2021-01-21
Supplement: fig7-data1 [file elife-63509-fig7-data1-v2.xlsx]

## Sheet: Sheet1
Hipp11-DLK(iOE)/+	Map3k13KO/KO	PvalbCre/+;Hipp11-DLK(iOE)/+	PvalbCre/+;Map3k13KO/KO;Hipp11-DLK(iOE)/+
996.583	1153.9	25	6
1017.8	1150.23	14	13
1175.69	997	24	9
882.053	959.894	2	5
1065.46	974	6	17
1229.79	1011.93	30	15
1050.44	1038	43	24
1066.18	1102	21	25
1024.63	1052	28	18
