# Supplementary material for: Activation of MAP3K DLK and LZK in Purkinje cells causes rapid and slow degeneration depending on signaling strength
Source: eLife journal article supplement (doi:10.7554/elife.63509), 2021-01-21
Supplement: fig7-data3 [file elife-63509-fig7-data3-v2.xlsx]

## Sheet: Sheet1
Hipp11-DLK(iOE)/+	Map3k13KO/KO	PvalbCre/+;Hipp11-DLK(iOE)/+	PvalbCre/+;Map3k13KO/KO;Hipp11-DLK(iOE)/+
7.60164	6.90608	2.02752	1.96949
7.38618	7.13975	2.74017	2.04988
8.06198	7.15835	1.94481	2.10026
6.06178	6.93491	1.90073	2.09101
7.20607	7.27096	1.89994	2.20574
7.26896	6.3644	2.30158	1.92863
7.67717	7.14937	2.32154	2.19415
8.06092	7.35844	2.24753	2.38523
7.14943	7.82535	2.2393	1.96431
