# Supplementary material for: Activation of MAP3K DLK and LZK in Purkinje cells causes rapid and slow degeneration depending on signaling strength
Source: eLife journal article supplement (doi:10.7554/elife.63509), 2021-01-21
Supplement: fig7-data4 [file elife-63509-fig7-data4-v2.xlsx]

## Sheet: Sheet1
	Hipp11-DLK(iOE)/+	Map3k13KO/KO	PvalbCre/+;Hipp11-DLK(iOE)/+	PvalbCre/+;Map3k13KO/KO;Hipp11-DLK(iOE)/+
	1	0.680814	13.6327	10.7225
	1.0658	1.01546	8.98881	8.84317
	0.934198	0.826324	7.61308	9.05762
	1.08952	0.862373	11.7428	7.96049
	1.05494	1.04085	8.47381	8.5218
	0.855544	0.914357	9.24068	10.2841
	1.02169	0.783426	11.3909	9.33753
	0.953018	0.681269	8.24255	9.60416
	1.02529	0.834492	10.363	11.3563
