# Supplementary material for: Activation of MAP3K DLK and LZK in Purkinje cells causes rapid and slow degeneration depending on signaling strength
Source: eLife journal article supplement (doi:10.7554/elife.63509), 2021-01-21
Supplement: fig7-data6 [file elife-63509-fig7-data6-v2.xlsx]

## Sheet: Sheet1
	Map3k12fl/fl;Hipp11-LZK(iOE)/+	PvalbCre/+;Map3k12fl/fl	PvalbCre/+;Hipp11-LZK(iOE)/+	PvalbCre/+;Map3k12fl/fl;Hipp11-LZK(iOE)/+
	150.527	144.815	73.46	75.646
	155.133	156.902	70.843	78.963
	162.111	166.486	68.984	86.315
	170.583	156.062	73.549	82.05
	164.263	166.52	80.365	72.288
	149.225	149.394	67.565	88.225
	150.382	153.624	60.839	92.398
	145.767	162.033	74.701	85.956
	148.207	167.711	65.071	94.137
	142.039		58.484
	154.113		74.684
	138.945		86.295
	188.097		85.794
	183.481		79.408
	174.863		77.374
