# Supplementary material for: Activation of MAP3K DLK and LZK in Purkinje cells causes rapid and slow degeneration depending on signaling strength
Source: eLife. 2021 Jan 21;10:e63509. doi: 10.7554/eLife.63509 (PMC7870138; doi:10.7554/eLife.63509)
Supplement: Figure 1—source data 3. [file elife-63509-fig1-data3.xlsx]

## Sheet: Sheet1
wild-type	LzkKO	Pv-Cre	Pv-Cre;Dlkfx/fx	Pv-Cre;Lzkfx/fx	Pv-Cre;Dlkfx/fx;Lzkfx/fx
143.926	142.334	138.633	144.815	155.106	152.874
172.422	149.153	168.205	156.902	152.215	154.964
187.437	146.772	130.941	166.486	159.855	156.792
167.802	172.291	168.982	156.062	157.861	150.393
142.334	160.449	173.32	166.52	165.018	150.368
143.66	157.599	179.211	149.394	159.14	158.941
152.316	165.273	143.172	153.624	170.317	151.919
140.335	173.193	150.628	162.033	172.922	149.12
131.114	176.017	150.325	167.711	154.296	144.744
