# Supplementary material for: Activation of MAP3K DLK and LZK in Purkinje cells causes rapid and slow degeneration depending on signaling strength
Source: eLife. 2021 Jan 21;10:e63509. doi: 10.7554/eLife.63509 (PMC7870138; doi:10.7554/eLife.63509)
Supplement: Figure 2—source data 2. [file elife-63509-fig2-data2.xlsx]

## Sheet: Sheet1
DLKOE
P5	2.59434	1.65729	3.12698	1.75851	2.28317	2.53496	1.8901	1.82271	1.98839
P10	4.83764	5.29309	5.18944	4.90292	4.98663	5.19547	4.76949	4.89449	4.15994
P15	5.79407	6.94984	7.25943	7.25471	6.92234	6.80746	6.4796	6.1876	6.91343
P21	8.06198	10.5074	8.15426	7.60164	7.38618	6.06178	7.20607	7.26896	7.67717
Pv-Cre;DLKOE
P5	1.89995	2.15831	2.6744	3.18891	2.16968	3.14993	2.70535	1.91548	2.23948
P10	3.52889	4.63605	4.51179	3.86802	4.36702	4.20517	4.06525	4.54199	3.49318
P15	3.76267	3.76516	4.44079	3.74364	3.71896	3.3907	4.14029	3.98441	3.93163
P21	2.74017	1.94481	1.90073	2.02752	1.89994	2.30158	2.32154	2.24753	2.2393
