# Supplementary material for: Activation of MAP3K DLK and LZK in Purkinje cells causes rapid and slow degeneration depending on signaling strength
Source: eLife. 2021 Jan 21;10:e63509. doi: 10.7554/eLife.63509 (PMC7870138; doi:10.7554/eLife.63509)
Supplement: Figure 2—source data 4. [file elife-63509-fig2-data4.xlsx]

## Sheet: Sheet1
	DLKOE
P5	26.239	22.049	22.103	27.777	19.733	19.733	27.355	25.374	26.617
P10	69.251	70.257	81.903	83.874	84.021	107.569	79.713	86.028	85.931
P15	108.027	109.255	108.396	97.918	101.226	102.308	100.355	105.176	112.474
P21	139.154	177.013	170.396	123.71	123.283	111.694	141.92	159.161	142.739
	Pv-Cre;DLKOE
P5	22.598	31.617	20.789	25.934	29.848	30.049	27.924	27.436	23.812
P10	55.386	45.665	55.594	54.103	45.106	50.279	50.031	53.589	52.287
P15	55.782	57.556	46.665	74.264	63.198	56.122	50.513	44.465	53.699
P21	43.633	45.832	39.914	53.436	38.888	40.985	31.383	40.901	50.102
