# Supplementary material for: Activation of MAP3K DLK and LZK in Purkinje cells causes rapid and slow degeneration depending on signaling strength
Source: eLife. 2021 Jan 21;10:e63509. doi: 10.7554/eLife.63509 (PMC7870138; doi:10.7554/eLife.63509)
Supplement: Figure 3—source data 1. [file elife-63509-fig3-data1.xlsx]

## Sheet: Sheet1
% (p-c-Jun+/Calbindin+)
	DlkOE	Pv-Cre;DlkOE
	0	5.31915
	0	3.0426
	0	4.78261
	0	6.55527
	0	5.83265
	0	3.57097
	0	5.52749
	0	4.83275
	0	4.33847
