# Supplementary material for: Activation of MAP3K DLK and LZK in Purkinje cells causes rapid and slow degeneration depending on signaling strength
Source: eLife. 2021 Jan 21;10:e63509. doi: 10.7554/eLife.63509 (PMC7870138; doi:10.7554/eLife.63509)
Supplement: Figure 3—source data 2. [file elife-63509-fig3-data2.xlsx]

## Sheet: Sheet1
% (cleaved caspase-3+ / Calbindin+)
	DlkOE	Pv-Cre;DlkOE
	0	6.94143
	0	7.18954
	0	6.90377
	0	9.46502
	0	8.13008
	0	12.0438
	0	11.5646
	0	7.14286
	0	8.82783
