# Supplementary material for: Activation of MAP3K DLK and LZK in Purkinje cells causes rapid and slow degeneration depending on signaling strength
Source: eLife. 2021 Jan 21;10:e63509. doi: 10.7554/eLife.63509 (PMC7870138; doi:10.7554/eLife.63509)
Supplement: Figure 3—source data 3. [file elife-63509-fig3-data3.xlsx]

## Sheet: Sheet1
% (Dendrite Swelling+ / Calbindin+)
DlkOE
P10	0	0	0	0	0	0	0	0	0
P15	0	0	0	0	0	0	0	0	0
P21	0	0	0	0	0	0	0	0	0
Pv-Cre;DlkOE
P10	0.15949	0.348432	0.256739	1.12	0.765697	0.947867	0.798722	0.60423	0.78125
P15	11.4832	10.3306	7.14286	5.91398	8.22511	6.0241	6.91489	13.7255	11.9342	12.1951	13.5036	13.2653
P21	4	7.14286	4.16667	4	7.14286	8.33333	4.65116	9.52381	3.57143
