# Supplementary material for: Activation of MAP3K DLK and LZK in Purkinje cells causes rapid and slow degeneration depending on signaling strength
Source: eLife. 2021 Jan 21;10:e63509. doi: 10.7554/eLife.63509 (PMC7870138; doi:10.7554/eLife.63509)
Supplement: Figure 3—source data 4. [file elife-63509-fig3-data4.xlsx]

## Sheet: Sheet1
	DPvc P15 dendrite swelling/total PCs
		DlkOE	Pv-Cre;DlkOE
		0	5.42299
		0	5.88235
		0	7.53138
		0	11.9342
		0	12.1951
		0	13.5036
		0	13.2653
		0	11.1554
		0	10.2662
	DPvc P15 dendrite swelling+c-caspase3+/total PCs
		DlkOE	Pv-Cre;DlkOE
		0	3.47072
		0	4.3573
		0	4.1841
		0	7.81893
		0	6.50407
		0	8.0292
		0	9.86395
		0	7.17131
		0	7.60456
