# Supplementary material for: Activation of MAP3K DLK and LZK in Purkinje cells causes rapid and slow degeneration depending on signaling strength
Source: eLife. 2021 Jan 21;10:e63509. doi: 10.7554/eLife.63509 (PMC7870138; doi:10.7554/eLife.63509)
Supplement: Figure 4—source data 1. [file elife-63509-fig4-data1.xlsx]

## Sheet: Sheet1
	LZKOE
	P15	971.441	1119.93	1060.25	1211.16	1124.27	1032.58	985.559	954.927	1002.3
	P21	1040	891	963	1233.68	1168	928.774	952.534	1150	1052
	P30	1120	1127	1134	1180	1241	1114	1125	1089	1143
	P45	991.576	1001	1026	979	1113.96	772	1037.77	968.114	956.093
	P60	920.358	1047.22	987.362	914.527	1004	932	926	958	920.834
	P120	1047	1160	1127	1004	903	966	943.286	973.685	1051.49
	Pv-Cre;LZKOE
	P15	847.864	847	830.656	802.136	769	820	832	818	823
	P21	630.284	658	830.407	628	686	652	648	680	660
	P30	441	469	510	478	605	482	504	462	455
	P45	379	516.801	423	513	393	414	423.026	427	435
	P60	431	337	413.642	397	610	334	463	421	467
	P120	405.755	378.522	435	335	335	336	441	395	409
