# Supplementary material for: Activation of MAP3K DLK and LZK in Purkinje cells causes rapid and slow degeneration depending on signaling strength
Source: eLife. 2021 Jan 21;10:e63509. doi: 10.7554/eLife.63509 (PMC7870138; doi:10.7554/eLife.63509)
Supplement: Figure 4—source data 2. [file elife-63509-fig4-data2.xlsx]

## Sheet: Sheet1
	LzkOE
	P15	5.33927	7.18463	6.53368	6.63513	7.06858	7.12601	6.96599	7.09916	7.28039
	P21	8.15426	8.06198	10.5074	7.60164	7.60164	7.38618	7.49329	8.67678	7.41052
	P30	7.54224	7.2995	7.24127	7.66244	7.57683	7.06548	7.88582	7.60787	7.87358
	P45	6.82303	6.49916	6.93526	7.02183	7.8981	6.34814	7.60109	6.76801	6.48212
	P60	8.16525	7.50476	6.3071	7.72413	7.2817	8.7209	7.51631	8.9205	9.3115
	P120	8.42994	8.39185	8.38772	7.27997	6.83567	7.12049	7.86591	8.14396	8.36091
	Pv-Cre;LzkOE
	P15	5.12238	5.1308	5.89946	5.88899	5.47571	5.86423	6.13337	5.6631	5.96294
	P21	5.28988	5.10935	6.68875	5.92493	6.34395	4.98916	4.31457	4.935	5.58038
	P30	5.21359	4.7668	4.81034	4.5104	4.92455	5.12461	5.01699	4.92817	4.58439
	P45	4.83685	4.74527	4.67117	4.6977	4.61467	4.07076	4.56206	4.51476	4.85869
	P60	5.27834	4.98738	4.65973	5.34977	5.78884	4.8703	5.37749	5.58463	5.51642
	P120	4.98859	5.03169	4.85238	4.42802	4.47063	4.40089	4.30129	4.17894	4.21991
