# Supplementary material for: Activation of MAP3K DLK and LZK in Purkinje cells causes rapid and slow degeneration depending on signaling strength
Source: eLife. 2021 Jan 21;10:e63509. doi: 10.7554/eLife.63509 (PMC7870138; doi:10.7554/eLife.63509)
Supplement: Figure 4—source data 3. [file elife-63509-fig4-data3.xlsx]

## Sheet: Sheet1
LZKOE
P15	81.069	95.516	122.466	95.094	104.249	118.558	96.936	126.736	127.617
P21	139.898	129.301	142.993	134.959	143.311	153.699	134.602	138.208	140.621
P30	154.325	159.508	135.444	146.68	140.713	134.479	139.651	137.653	138.233
P45	141.735	138.324	140.332	148.925	168.861	134.146	153.695	128.707	131.049
P60	170.583	164.263	149.225	150.382	145.767	148.207	142.039	154.113	138.945
P120	176.71	165.174	165.442	165.1	136.738	148.277	143.289	151.593	158.75
Pv-Cre;LZKOE
P15	77.334	80.259	80.83	84.721	84.964	82.729	83.763	83.499	84.676
P21	108.253	91.465	108.149	74.267	95.921	84.977	78.431	84.128	90.666
P30	63.144	66.409	68.389	105.451	83.717	101.176	91.899	84.058	74.469
P45	79.926	67.692	84.192	74.264	72.434	68.417	61.051	63.547	68.857
P60	73.46	70.843	68.984	73.549	80.365	67.565	44.135	60.839	74.701
P120	81.281	73.065	55.635	88.848	83.326	68.85	69.963	67.163	55.263
