# Supplementary material for: Activation of MAP3K DLK and LZK in Purkinje cells causes rapid and slow degeneration depending on signaling strength
Source: eLife. 2021 Jan 21;10:e63509. doi: 10.7554/eLife.63509 (PMC7870138; doi:10.7554/eLife.63509)
Supplement: Figure 5—source data 1. [file elife-63509-fig5-data1.xlsx]

## Sheet: Sheet1
Pv-Cre
P30	0	0	0	0	0	0	0	0
P45	0	0	0	0	0	0	0	0	0	0	0	0	0	0	0	0	0
P60	0	0	0	1.66667	0	0	0	0	0	0	0	0	0	0	0	0	0	0	0	0	0	0	0
P75	0	0	0	0	0	2	0	0	0.333333	0	0	0	0	0	0	0	0	0	0
P90	0	0	0	0	0	0	0	0	0	0	0	0	0	0	0	0	0	0	0	0	0	0
P105	0	0	0	0	0	0	0	0	0	0	0	0
P120	0	0	0	0	0	0	2	0	0	0	0	0
Pvcre;Celf2fx/fx
P30	0	0	0	0	0
P45	0	0	0	0	0	0	0	0
P60	0	0	0	0	0	0	0
P75	0	0	0	0	0	0
P90	0	0	0	0
P105	0	0	0	0
P120	0	0	0	0	0
Pvcre;LzkiOE
P30	3	3	3	2.66667	3	3	2	2	2	2	2	2	2.33333	1	2	1.66667	2.33333	3	3	3	3
P45	2.33333	2	2	2	2	2	2
P60	3	2	2	2	2.33333	2	2	2	2.33333	2	2	2	2	2	2.33333	2	2.66667	2	2	2
P75	2.66667	2	1.66667	2	2.33333	2.66667	2	2.33333	3	2	2	2.33333	1.33333	2	2	2.66667	2.33333	2.33333	2	2.33333	2
P90	2.66667	2	2	3	2.66667	2	2	2	2	2	2	2	2	2	2.33333	2.33333	2.66667	1.66667	2	2	1.66667	2.33333	2	2	1.75	2.33333
P105	2.33333	2	2	2	2	2	2	2	2	2	2	3	2.66667	2	2	2	2	2.66667
P120	2	2.66667	2.5	2.33333	2	2	2	2	2.33333	2.33333	2	0.333333	2.33333	2.33333	2.33333	3	3	2	3
Pvcre;Celf2fx/fx;LzkiOE
P30	2	2	2.33333	1	2
P45	2.66667	2	1.33333	2	2	2	2	2
P60	2	1.33333	1.66667	1.66667	0.5	1.66667	2	2	1.66667	0	1.66667
P75	2	2	2	1.66667	0.333333	0	2	1.66667	2	0	2
P90	2.33333	1.33333	2	2	2	2	1.66667	0	0	0	0	2	2.33333
P105	2.33333	1.66667	1.66667	0	2	2	2.33333	2
P120	1.66667	0	2	2	2.33333	2.33333	2	2
