# Supplementary material for: Activation of MAP3K DLK and LZK in Purkinje cells causes rapid and slow degeneration depending on signaling strength
Source: eLife. 2021 Jan 21;10:e63509. doi: 10.7554/eLife.63509 (PMC7870138; doi:10.7554/eLife.63509)
Supplement: Figure 5—source data 3. [file elife-63509-fig5-data3.xlsx]

## Sheet: Sheet1
Pv-Cre
P30	0	0	0	0	0	0	0	0
P45	0	0	0	0	0	0	0	0	0	0	0	0	0	0	0	0	0
P60	0	0	0	0.333333	0	0	0	0	0	0	0	0	0	0	0	0	0	0	0	0	0	0	0
P75	0	0	0	0	0	0.333333	0	0	0.333333	0	0	0	0	0	0	0	0	0	0
P90	0	0	0	0	0	0	0	0	0	0	0	0	0	0	0	0	0	0	0	0	0	0
P105	0	0	0	0	0	0	0	0	0	0	0	0
P120	0	0	0	0	0	0	0.666667	0	0	0	0	0
Pvcre;Celf2fx/fx
P30	0	0	0	0	0
P45	0	0	0	0	0	0	0	0
P60	0	0	0	0	0	0	0
P75	0	0	0	0	0	0
P90	0	0	0	0
P105	0	0	0	0
P120	0	0	0	0	0
Pvcre;LzkiOE
P30	0.333333	0.333333	0.333333	0.333333	0.333333	0.333333	0.333333	0.666667	0.333333	1	1	1	1	1	1	1	2	2	1	1	1
P45	1	2	1	2	1	1	1
P60	0.666667	1.33333	1	1.66667	1	1	0.666667	0.333333	2	2	2	2	1	1	1.66667	1.33333	2	2	1.66667	2
P75	2	2	2	2	2	2	2	2	1	0.666667	1	1	1	0.666667	1
P90	1.66667	1.33333	1.33333	1.66667	0.666667	1.66667	1.33333	1.33333	2	2	2	2	2	2	2	2	2	1	2	2	1.66667	1.33333	0.666667	2	1.33333	1.33333
P105	1.66667	0.666667	1	1	1.33333	2	2	2	2	2	2	2	2	2	2	2	2	1
P120	2	2	2	2	2	2	2	2	2	2	2	1	2	2	2	2	2	2	2
Pvcre;Celf2fx/fx;LzkiOE
P30	0.666667	0.666667	1	0	0
P45	0	0.666667	1	1	0	0.333333	0.333333	0.666667
P60	0	0	0.333333	0.333333	0.333333	0.333333	0.666667	1	0.333333	0	0.666667
P75	0.333333	0.333333	0.333333	0	0.333333	0	0.333333	0.333333	0.333333	0	0.333333
P90	0.333333	0.333333	0.333333	0.333333	0	0.333333	0.333333	0	0.333333	0	0	1	0.333333
P105	0.333333	0.333333	0.333333	0	0.333333	0.333333	1	1
P120	0.666667	0	1	0.666667	0.333333	1	1	0.666667
