# Supplementary material for: Activation of MAP3K DLK and LZK in Purkinje cells causes rapid and slow degeneration depending on signaling strength
Source: eLife. 2021 Jan 21;10:e63509. doi: 10.7554/eLife.63509 (PMC7870138; doi:10.7554/eLife.63509)
Supplement: Figure 5—source data 6. [file elife-63509-fig5-data6.xlsx]

## Sheet: Sheet1
Pv-Cre
P30	25.1	25.7	12.6	14.8	16.4	16.1	12.2	13.3	12.7
P45	26.5	27.3	15.5	16.5	17.8	18.3	15.1	14.5	13.4
P60	28	30.2	26.2	26.5	27.8	26.4	20.9	19.9	21.1	16.3	17.6	22	19.4	18.2	17.5	18.4	21.4
P75	29.1	33.4	26.3	26.4	29.2	26.2	23	22.5	23.3	19.1	20.1	20.7	19.8	24.3
P90	32	38.4	28.1	27	28	27.5	30.1	26.6	24.7	24	25.2	20.6	22.8	21.4	20.4	25.3
P105	30.6	39	29	28.8	29.2	21.3	21.2	22	20.2	26
P120	31	29.5	30	22.1	22.4	20.9	26
Pv-Cre;Celf2fx/fx
P30	14.1	16.7	12.9	14	13.4
P45	16	20.2	16.6	15.6	13.2
P60	19.5	22.9	18.9	18	15.4	20	22.3	27.3
P75	21.3	24.2	19.7	19.5	22.6	25.2
P90	19.6	20.5	24.3	26.7	20.7	23.7
P105	20.7	21.1		24.1	26.6
P120	22.1	21.8	24	27.5
Pv-Cre;LzkOE
P30	11.9	11.2	11.3	12.7	10.1	10.9	10.5	10.5	9.6	8.2	7.4	8.6	11	8.5
P45	13.4	13.7	13.9	14.8	12	12.3	12.8	12.4	12.3	10.3	12.7	11.8	13.1	12.3	12	13
P60	14.3	14.1	15.5	11.8	12.6	12.2	12.5	12.1	10.4	12	11.7	12.6	12.3	10.9	12.7	14.9	13.3	14.2	12.6	12.8
P75	15.5	15.2	16.1	13.8	13.2	14.6	13.9	13.8	15.5	16.2	17	16.3	17.9	14.1
P90	15.9	15.3	16.4	14.2	15.1	15.1	14.2	14.2	12.9	11.8	13	14	11.7	14.5	16.7	14	18	17.4	19.2	14.4
P105	14.7	16.1	15.4	14.5	15	13.3	13	14	14.2	12.2	14.8	12.6	16.8	16.9	16.3	14.6	12.2
P120	14.5	16.2	15.7	14.7	14.7	13.8	13.7	14.9	14.5	13	15.7	18.5	15.8	17.5	15.5	17.5	13	13.4
Pv-Cre;Celf2fx/fx;LzkOE
P30	10.2	13.9	12.6	7.3	7.9	8.4	8.2
P45	11.6	14.4	14.4	10.8	10.2	10.5	9.9
P60	11.2	13.3	13.1	15.2	17.1	14.6	16.7	15	10.5	10.2	11	10.6
P75	12.7	14.3	14	14.5	15	13.6	16.1	15.3	11.6	11	11	10.7
P90	13.6	14.3	14.6	15.3	15.6	13.6	16.8	14.3	16	15.1	11.3	11.6	11.3	10.9
P105	15.3	14.9	15.6	14.3	15.2	12.4	17.2	11.5	12.8	11
P120	15.7	14.9	15	15.4	14.4	13	18.2	11.9	13.8	12.4
