# Supplementary material for: Activation of MAP3K DLK and LZK in Purkinje cells causes rapid and slow degeneration depending on signaling strength
Source: eLife. 2021 Jan 21;10:e63509. doi: 10.7554/eLife.63509 (PMC7870138; doi:10.7554/eLife.63509)
Supplement: Figure 5—source data 9. [file elife-63509-fig5-data9.xlsx]

## Sheet: Sheet1
	Pv-Cre	Pv-Cre;Celf2fx/fx	Pv-Cre;LzkOE	Pv-Cre;Celf2fx/fx;LzkOE
	176.71	177.32	81.281	111.413
	165.174	164.514	73.065	113.396
	165.442	167.711	55.635	112.962
	165.1	176.758	88.848	96.974
	160.965	182.118	83.326	101.554
	148.277	159.468	68.85	85.632
	143.289	184.504	69.963	109.965
	151.593	170.729	67.163	111.222
	158.75	158.622	55.263	101.547
