# Supplementary material for: Activation of MAP3K DLK and LZK in Purkinje cells causes rapid and slow degeneration depending on signaling strength
Source: eLife. 2021 Jan 21;10:e63509. doi: 10.7554/eLife.63509 (PMC7870138; doi:10.7554/eLife.63509)
Supplement: Figure 6—source data 2. [file elife-63509-fig6-data2.xlsx]

## Sheet: Sheet1
% (Cleaved caspase-3+/ Calbindin+)
	Pv-Cre	Pv-Cre;Celf2fx/fx	Pv-Cre;LzkOE	Pv-Cre;Celf2fx/fx;LzkOE
	0	0	2.07715	0
	0	0	0.879765	0
	0	0	1.94444	0.102459
	0	0	0.680272	0
	0	0	1.26582	0
	0	0	1.22249	0
	0	0	1.47872	0.120048
	0	0	0.792557	0
	0	0	1.14943	0
