# Supplementary material for: Activation of MAP3K DLK and LZK in Purkinje cells causes rapid and slow degeneration depending on signaling strength
Source: eLife. 2021 Jan 21;10:e63509. doi: 10.7554/eLife.63509 (PMC7870138; doi:10.7554/eLife.63509)
Supplement: Figure 7—source data 1. [file elife-63509-fig7-data1.xlsx]

## Sheet: Sheet1
DlkOE	LzkKO	PV-Cre;DlkOE	PV-Cre;LzkKO;DlkOE
996.583	1153.9	25	6
1017.8	1150.23	14	13
1175.69	997	24	9
882.053	959.894	2	5
1065.46	974	6	17
1229.79	1011.93	30	15
1050.44	1038	43	24
1066.18	1102	21	25
1024.63	1052	28	18
