# Supplementary material for: Activation of MAP3K DLK and LZK in Purkinje cells causes rapid and slow degeneration depending on signaling strength
Source: eLife. 2021 Jan 21;10:e63509. doi: 10.7554/eLife.63509 (PMC7870138; doi:10.7554/eLife.63509)
Supplement: Figure 7—source data 2. [file elife-63509-fig7-data2.xlsx]

## Sheet: Sheet1
	DlkOE	LzkKO	Pv-Cre;DlkOE	Pv-Cre;LzkKO;DlkOE
	139.154	156.578	43.633	33.558
	177.013	143.999	45.832	16.249
	170.396	106.58	40.985	25.376
	123.71	130.464	39.914	30.349
	123.283	128.643	53.436	32.274
	111.694	115.147	38.888	23.364
	141.92	122.56	31.383	35.387
	159.161	152.506	40.901	28.253
	142.739	144.929	50.102	31.976
