# Supplementary material for: Activation of MAP3K DLK and LZK in Purkinje cells causes rapid and slow degeneration depending on signaling strength
Source: eLife. 2021 Jan 21;10:e63509. doi: 10.7554/eLife.63509 (PMC7870138; doi:10.7554/eLife.63509)
Supplement: Figure 7—source data 3. [file elife-63509-fig7-data3.xlsx]

## Sheet: Sheet1
DlkOE	LzkKO	PV-Cre;DlkOE	PV-Cre;LzkKO;DlkOE
7.60164	6.90608	2.02752	1.96949
7.38618	7.13975	2.74017	2.04988
8.06198	7.15835	1.94481	2.10026
6.06178	6.93491	1.90073	2.09101
7.20607	7.27096	1.89994	2.20574
7.26896	6.3644	2.30158	1.92863
7.67717	7.14937	2.32154	2.19415
8.06092	7.35844	2.24753	2.38523
7.14943	7.82535	2.2393	1.96431
