# Supplementary material for: Activation of MAP3K DLK and LZK in Purkinje cells causes rapid and slow degeneration depending on signaling strength
Source: eLife. 2021 Jan 21;10:e63509. doi: 10.7554/eLife.63509 (PMC7870138; doi:10.7554/eLife.63509)
Supplement: Figure 7—source data 5. [file elife-63509-fig7-data5.xlsx]

## Sheet: Sheet1
Dlkfx/fx;LzkOE	Pv-Cre;Dlkfx/fx	Pv-Cre;LzkOE	Pv-Cre;Dlkfx/fx;LzkOE
1100.41	962.821	431	350
1086.31	1013.98	337	439
1006.73	995.818	413.642	481
1041.55	1048.24	397	521
990.929	1005	610	539
983.595	947.513	334	550
809.067	1122.17	463	637
1222.43	1164.61	421	556
1204.49	944.695	467	553
