# Supplementary figures and images for: Activation of MAP3K DLK and LZK in Purkinje cells causes rapid and slow degeneration depending on signaling strength
Source: eLife journal article supplement (doi:10.7554/elife.63509), 2021-01-21

Figure 3-figure supplement 2

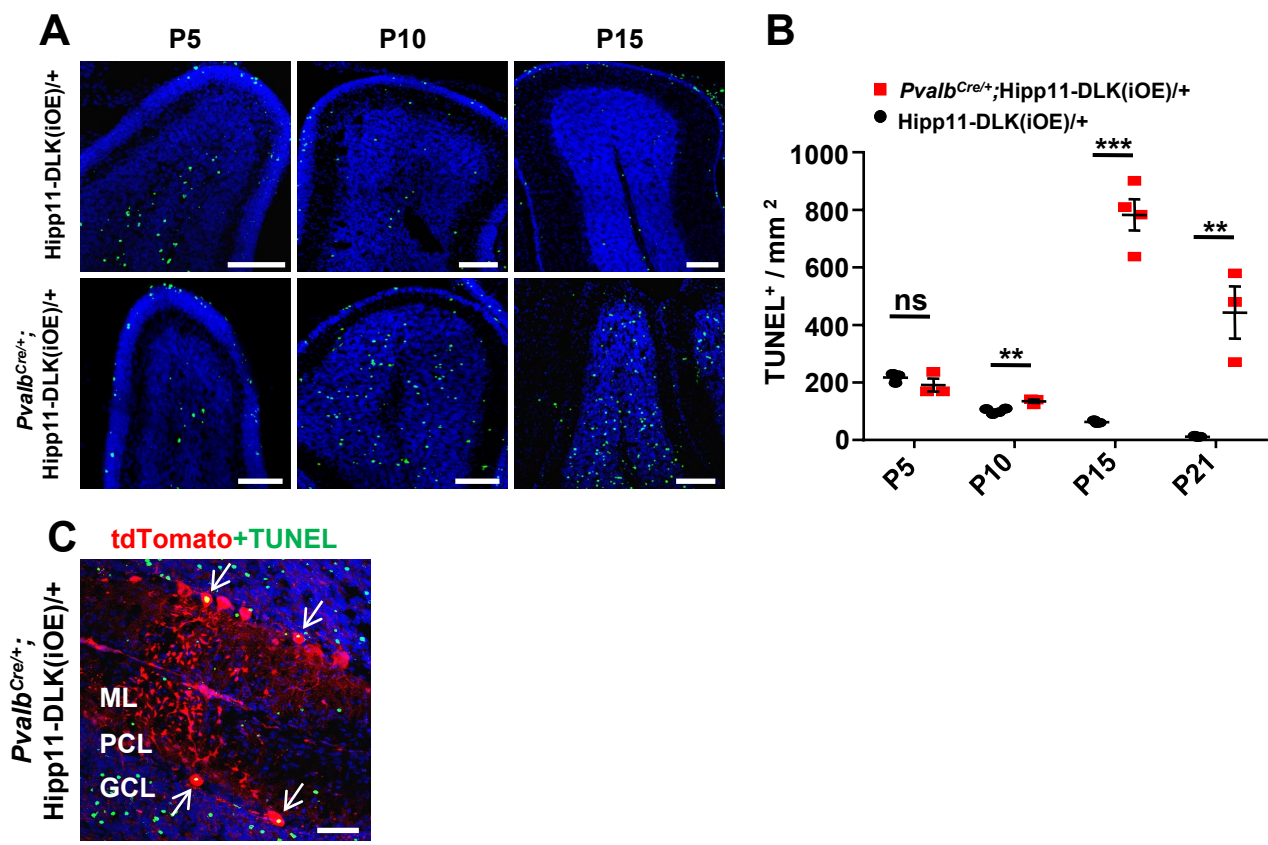

Supplement: supp [file elife-63509-supp-v1.zip]

Figure 3-figure supplement 4

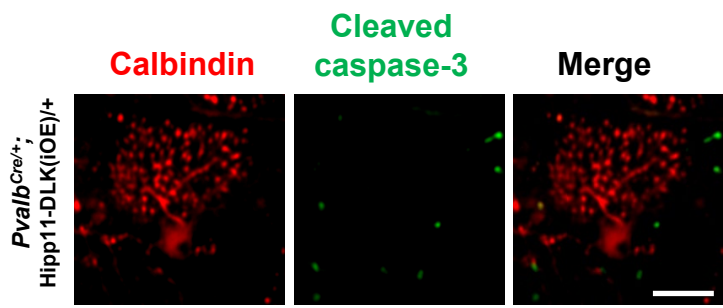

Supplement: supp [file elife-63509-supp-v1.zip]

Figure 4-figure supplement 1

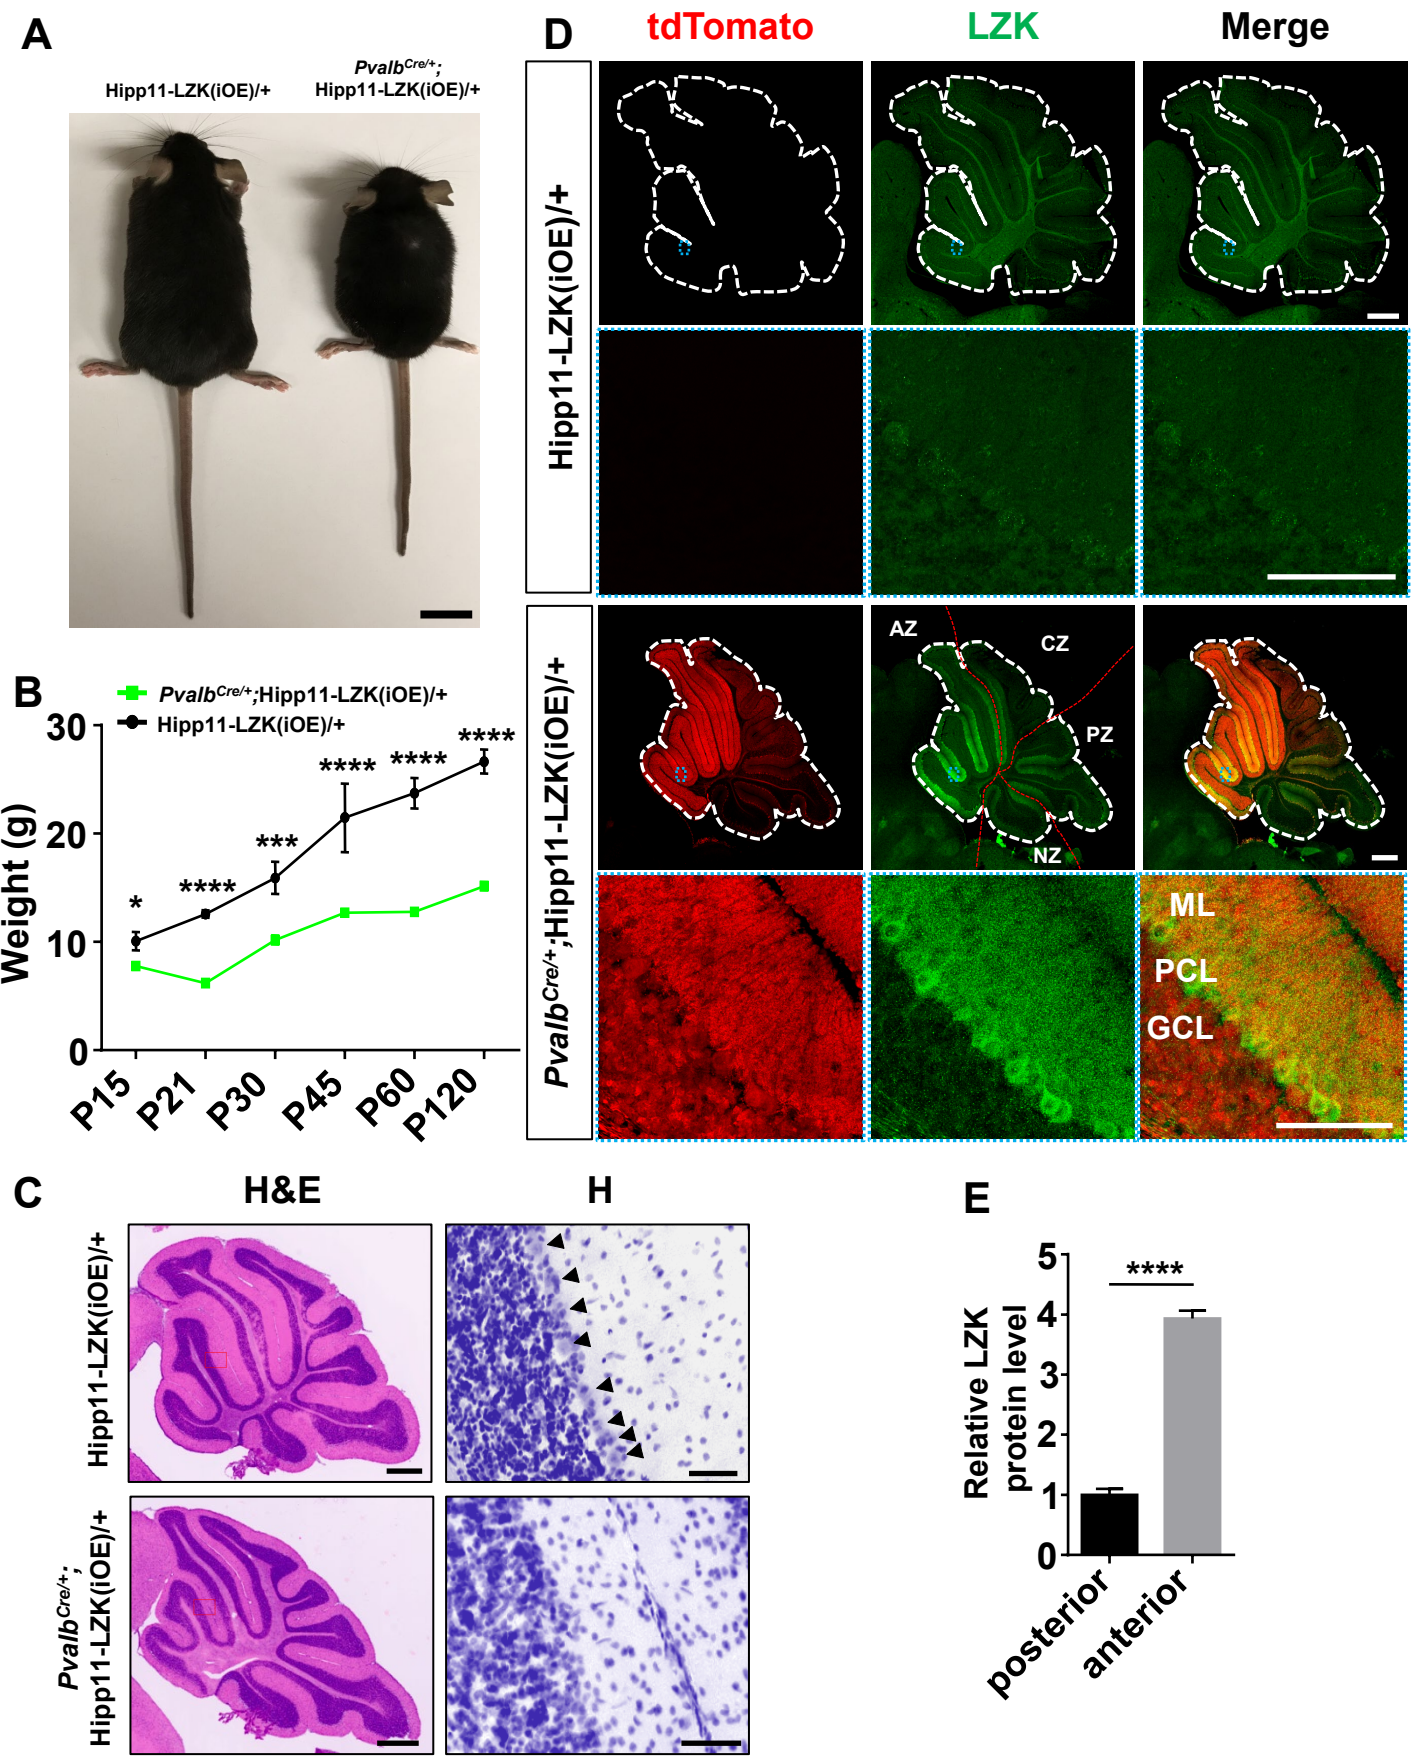

Supplement: supp [file elife-63509-supp-v1.zip]

# Figure 5-figure supplement 1

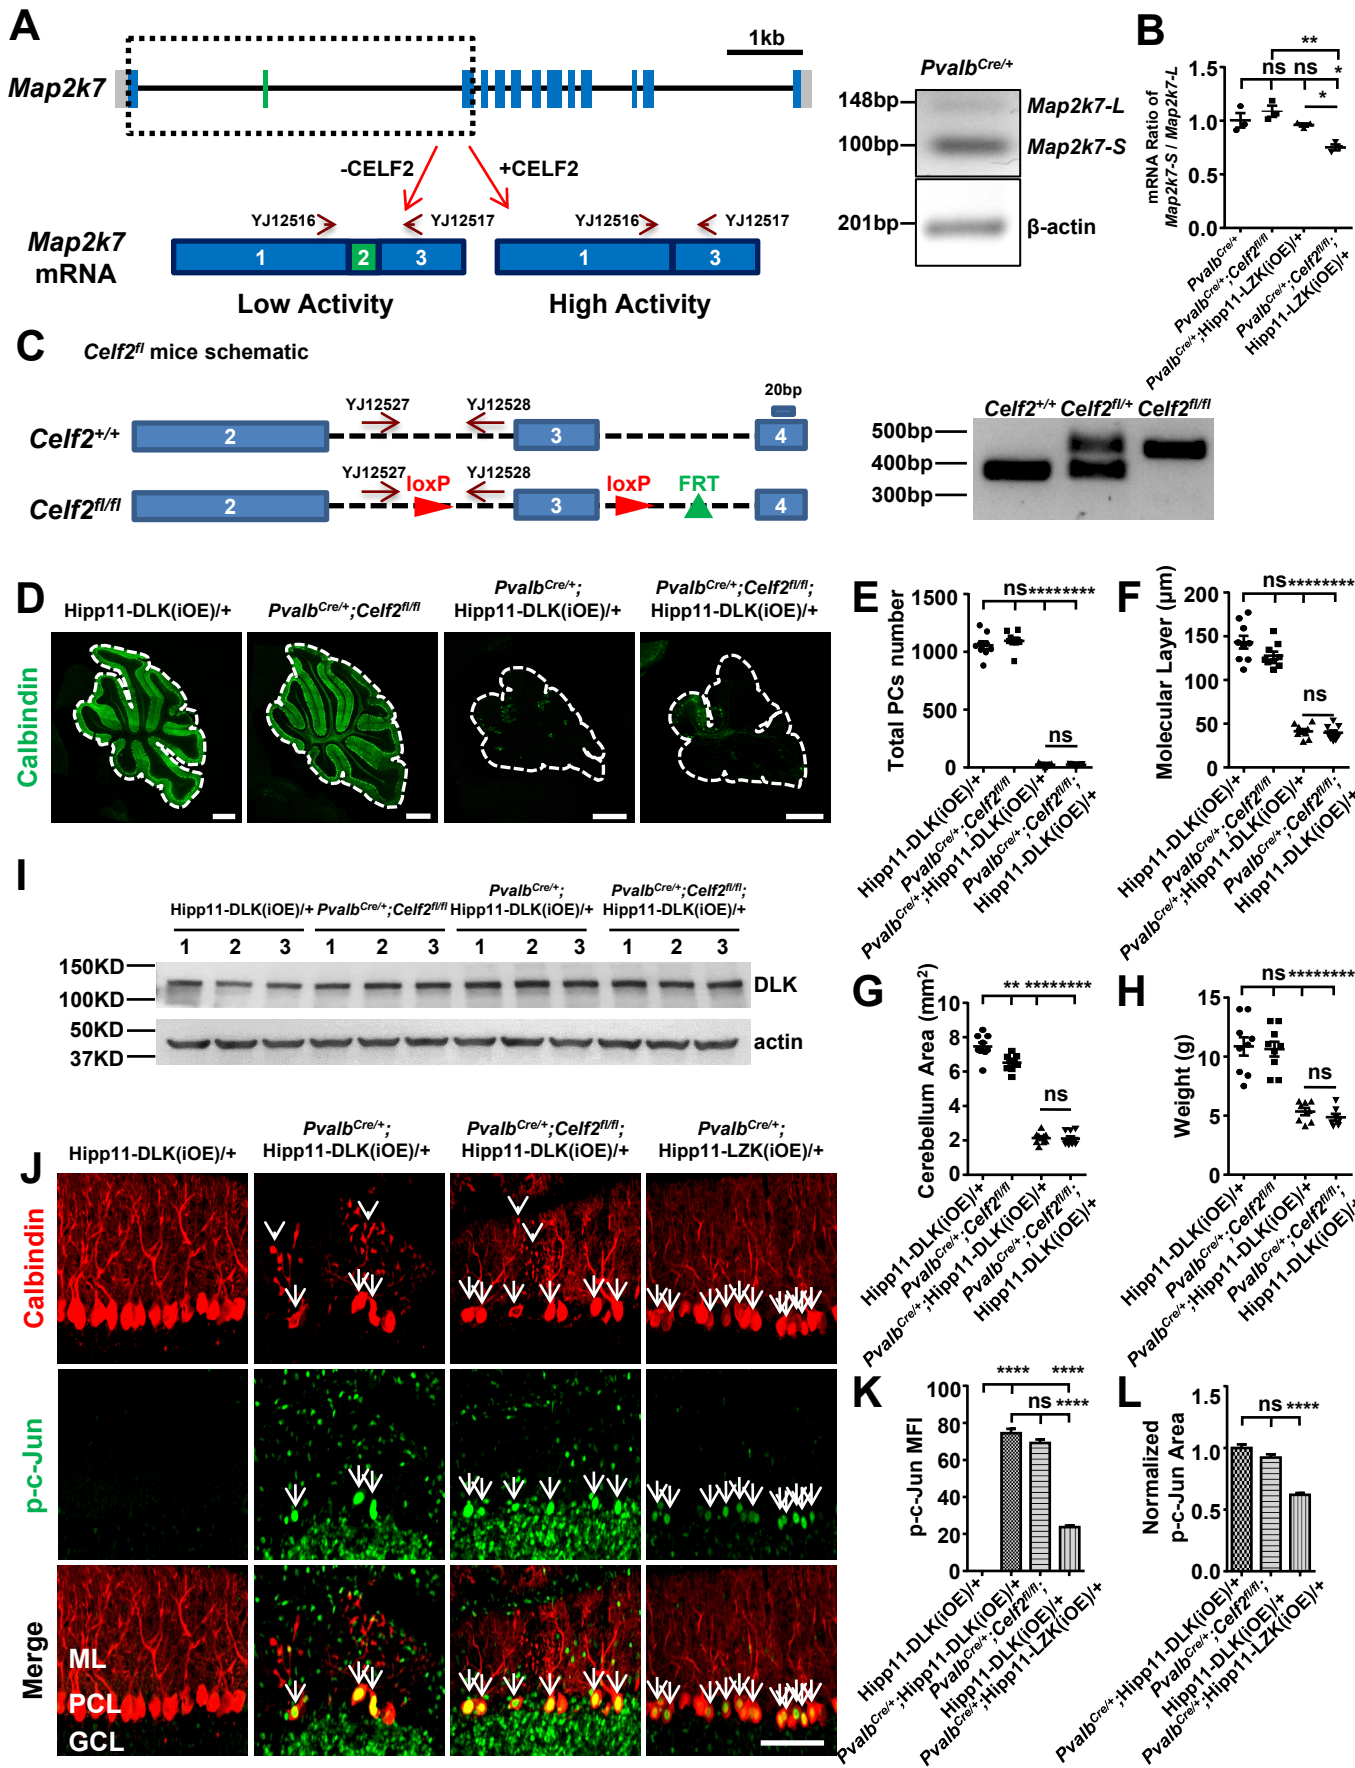

Supplement: supp [file elife-63509-supp-v1.zip]

# Figure 2-figure supplement 1

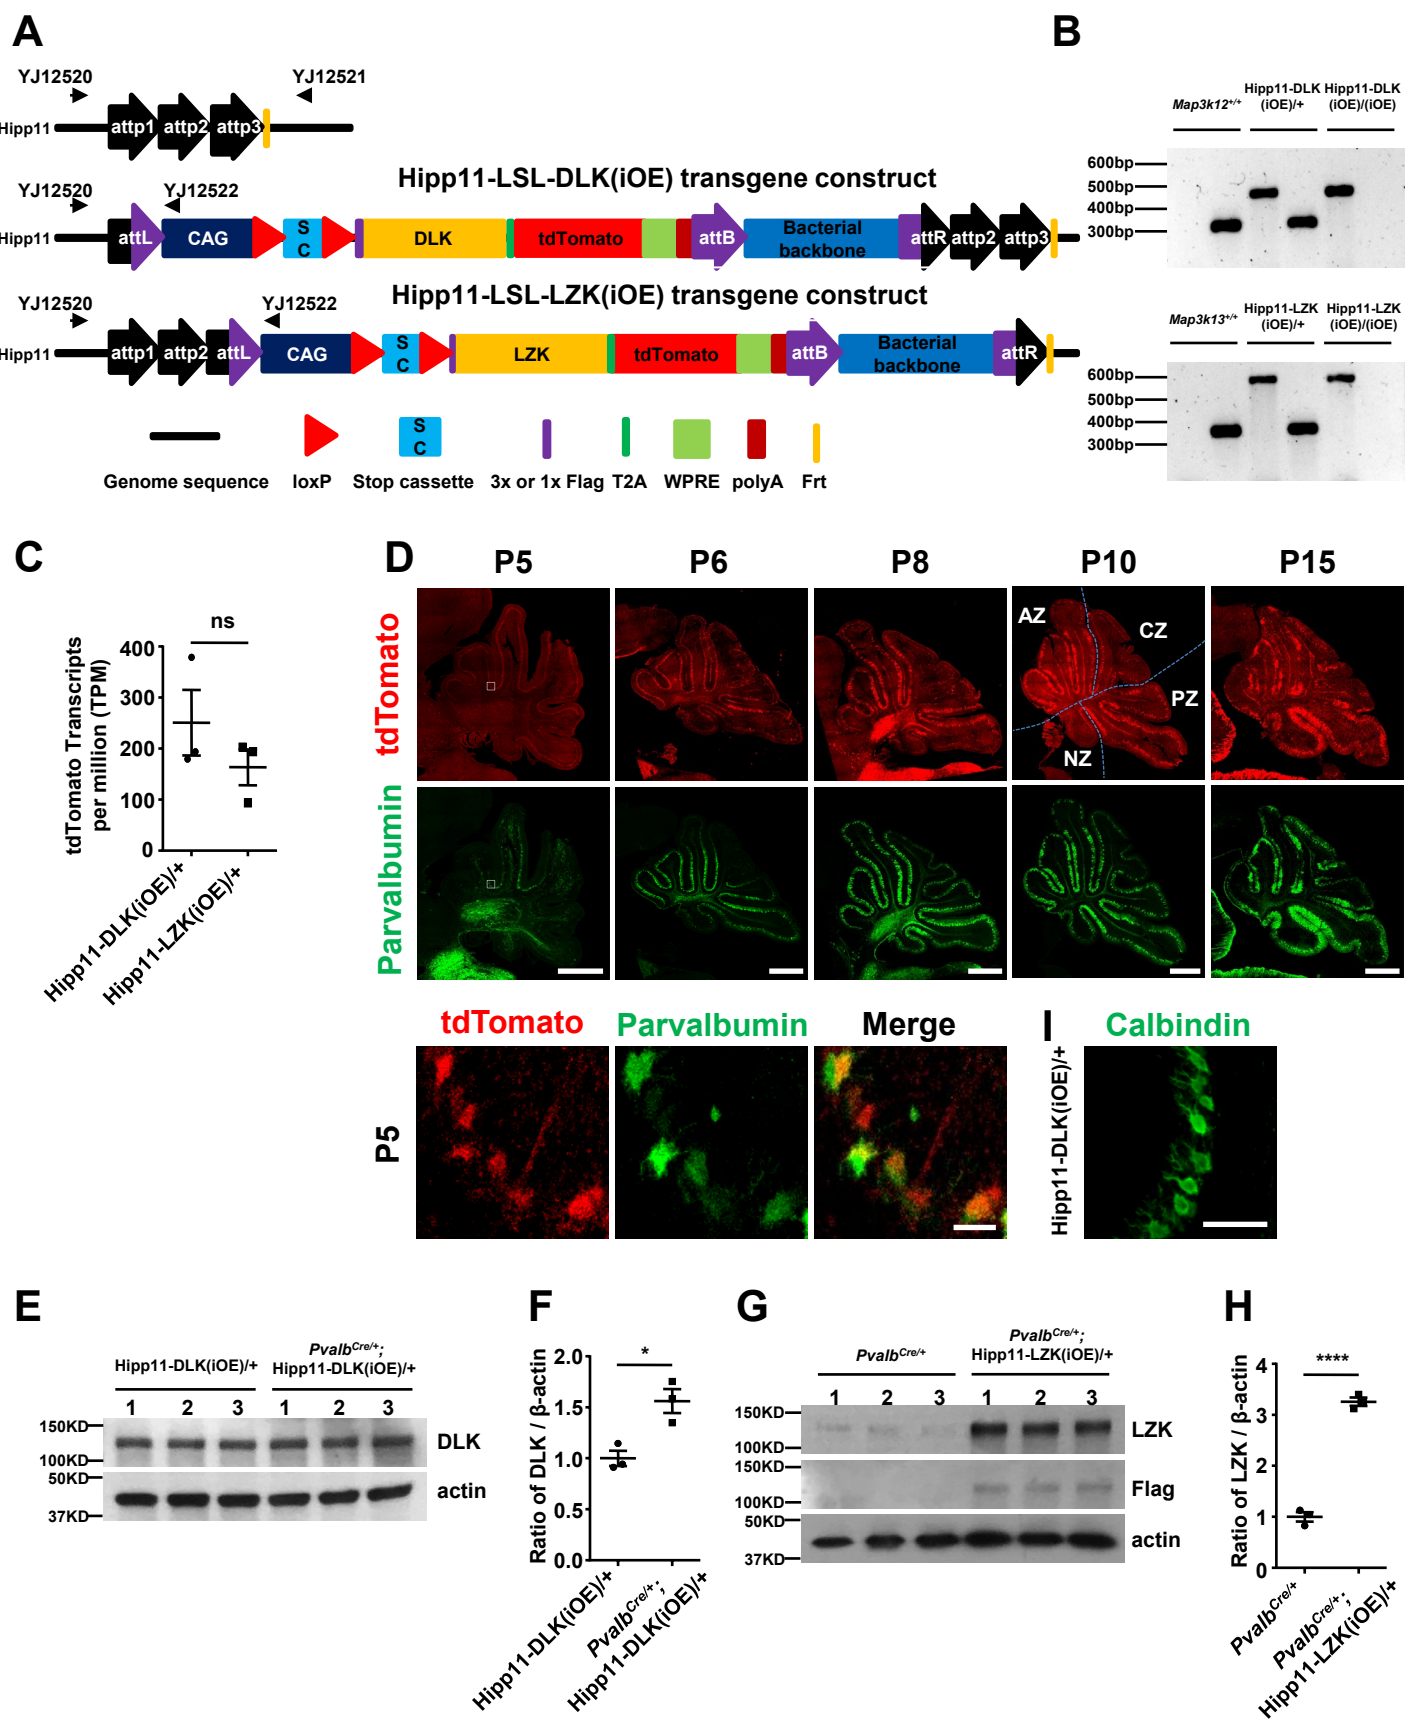

Supplement: supp [file elife-63509-supp-v1.zip]

Figure 1-figure supplement 1

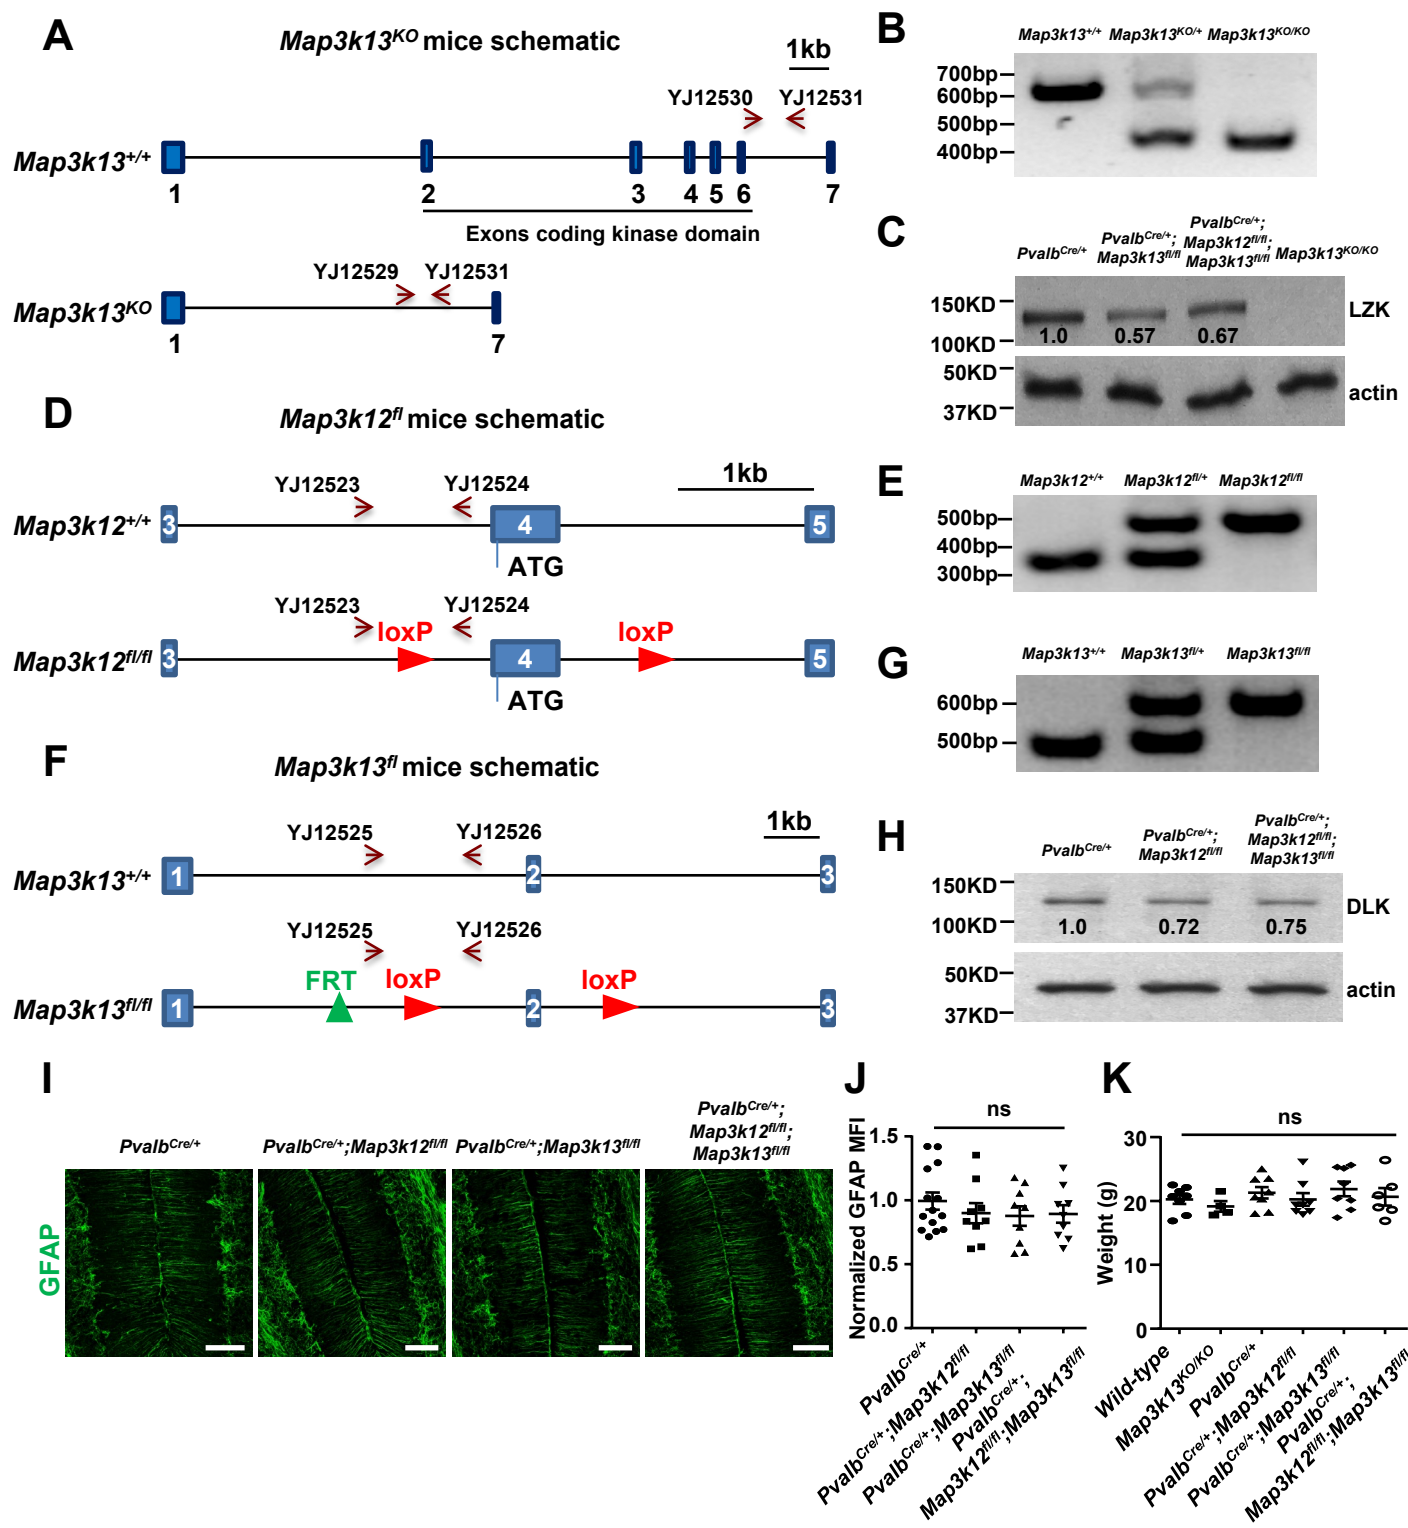

Supplement: supp [file elife-63509-supp-v1.zip]

Figure 5-figure supplement 3

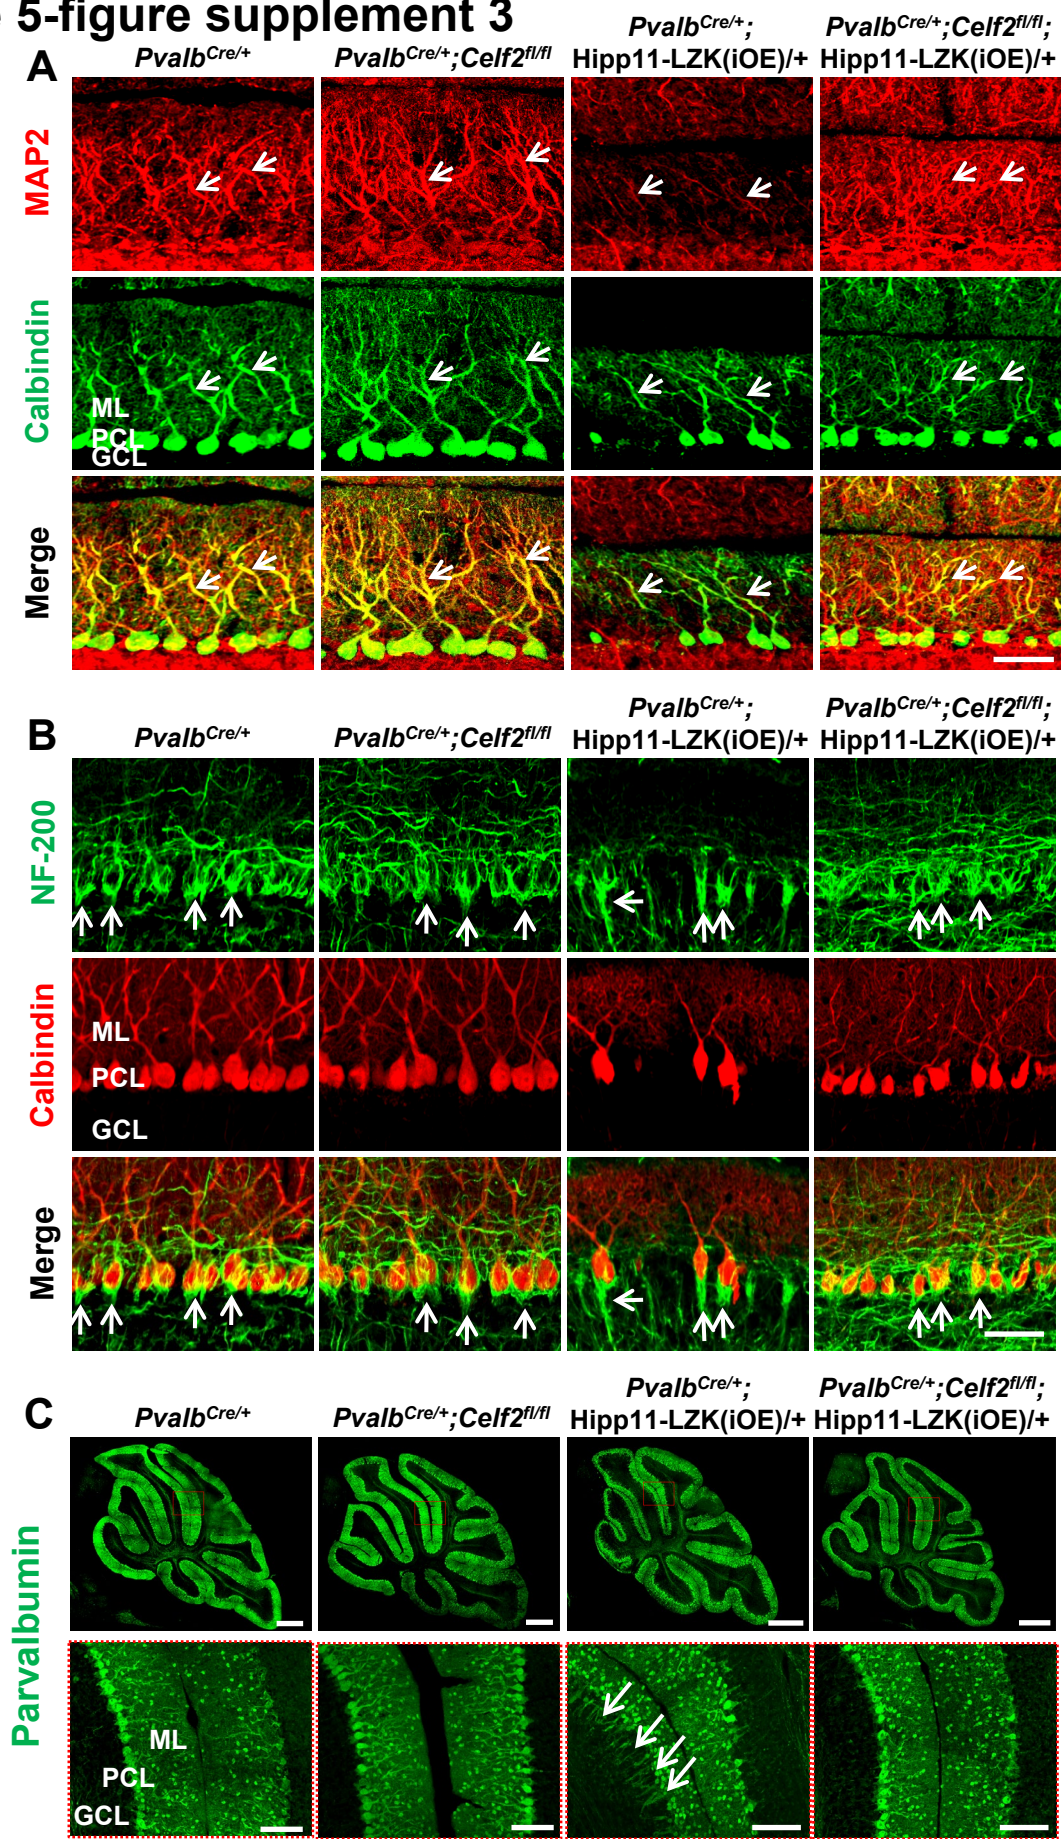

Supplement: supp [file elife-63509-supp-v1.zip]

Figure 2-figure supplement 2

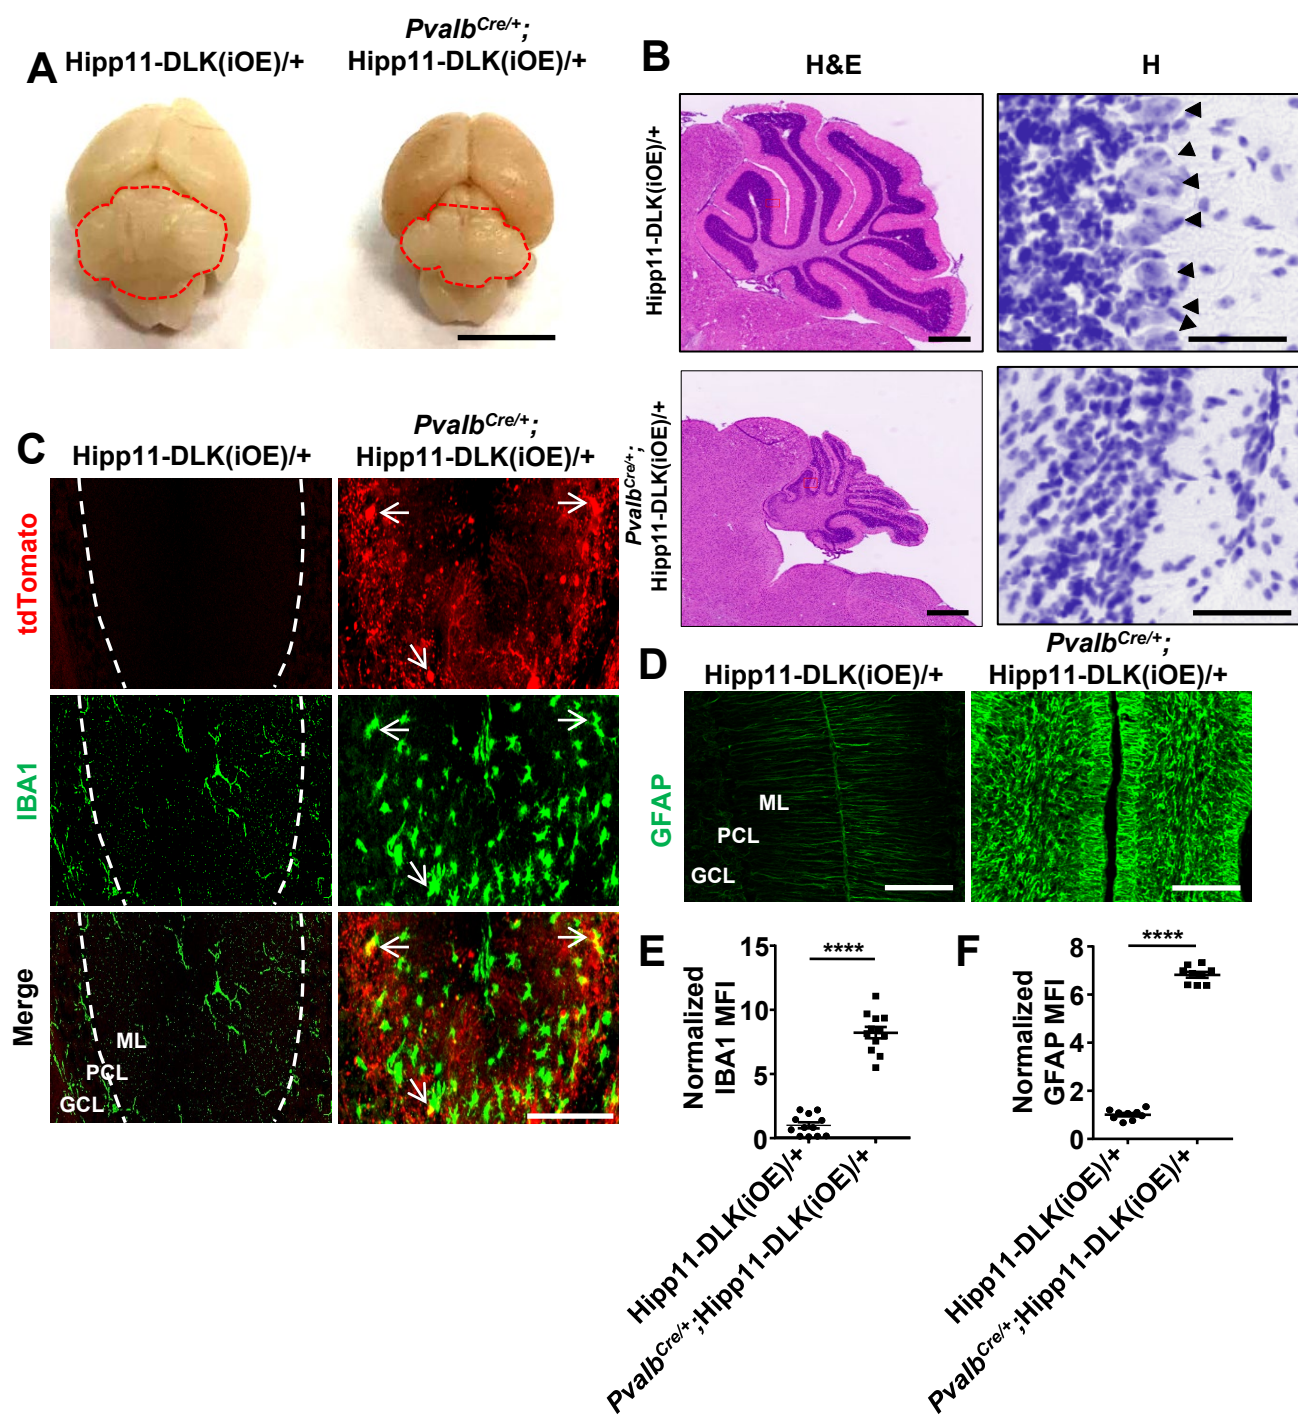

Supplement: supp [file elife-63509-supp-v1.zip]

Figure 5-figure supplement 2

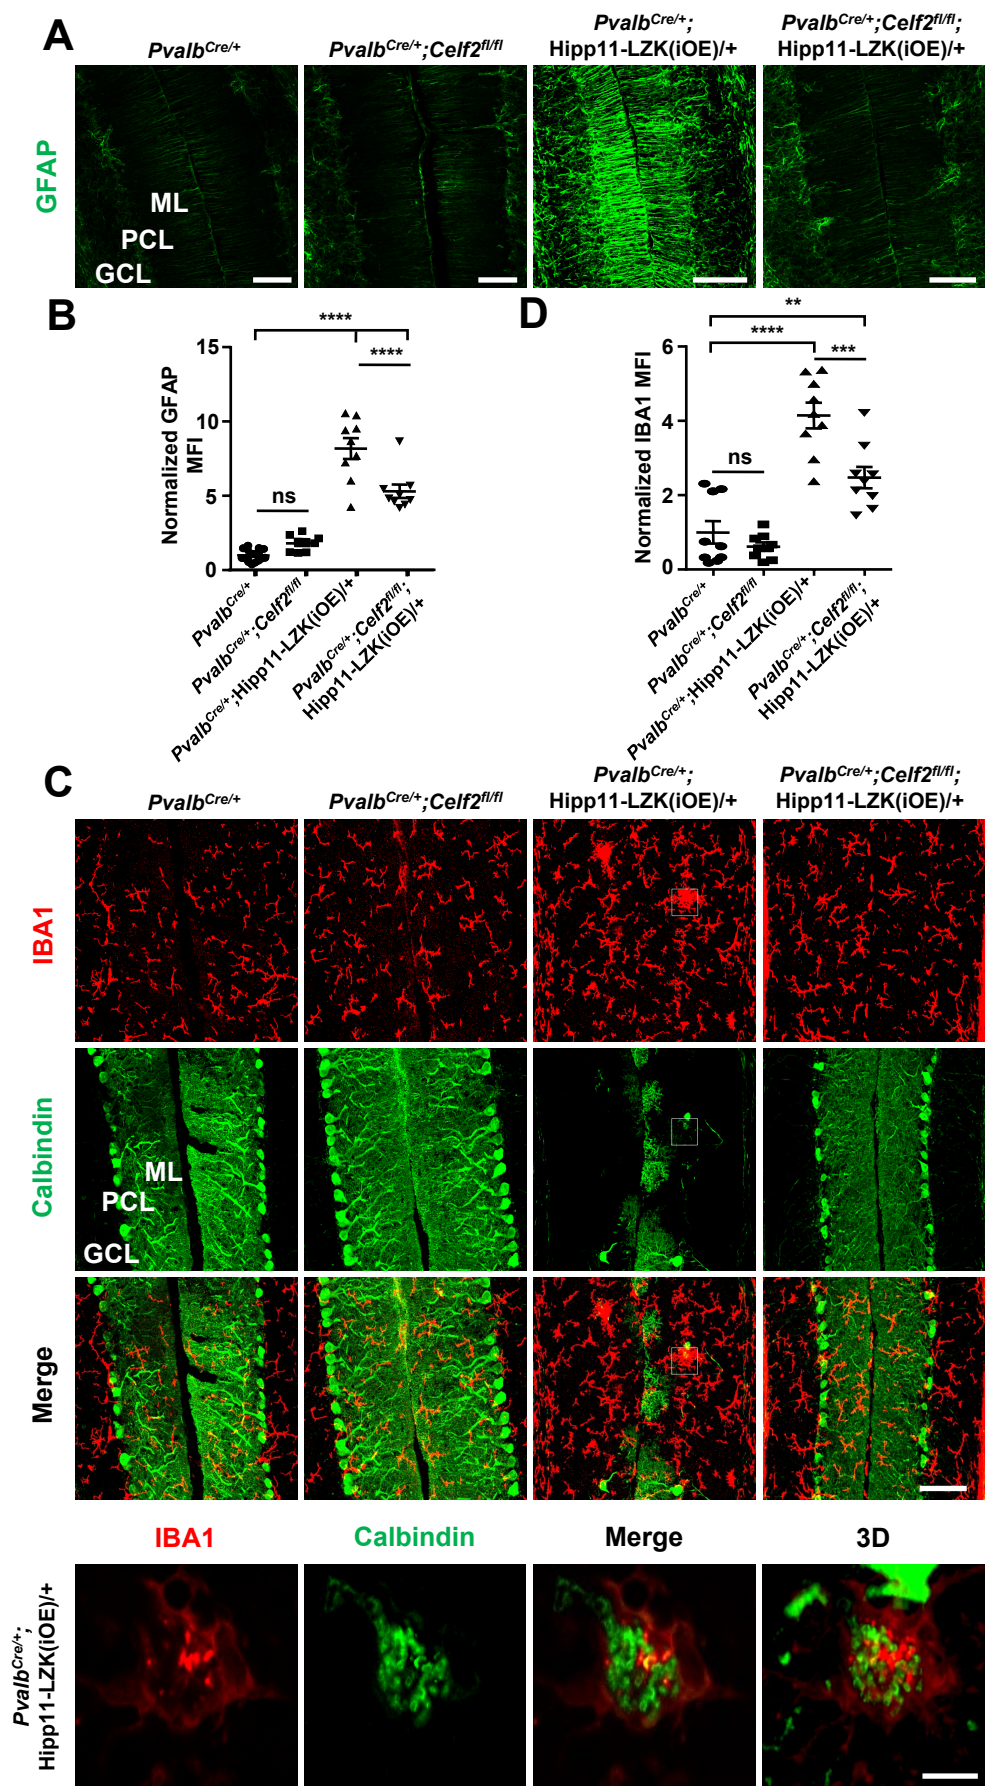

Supplement: supp [file elife-63509-supp-v1.zip]

Figure 4-figure supplement 2

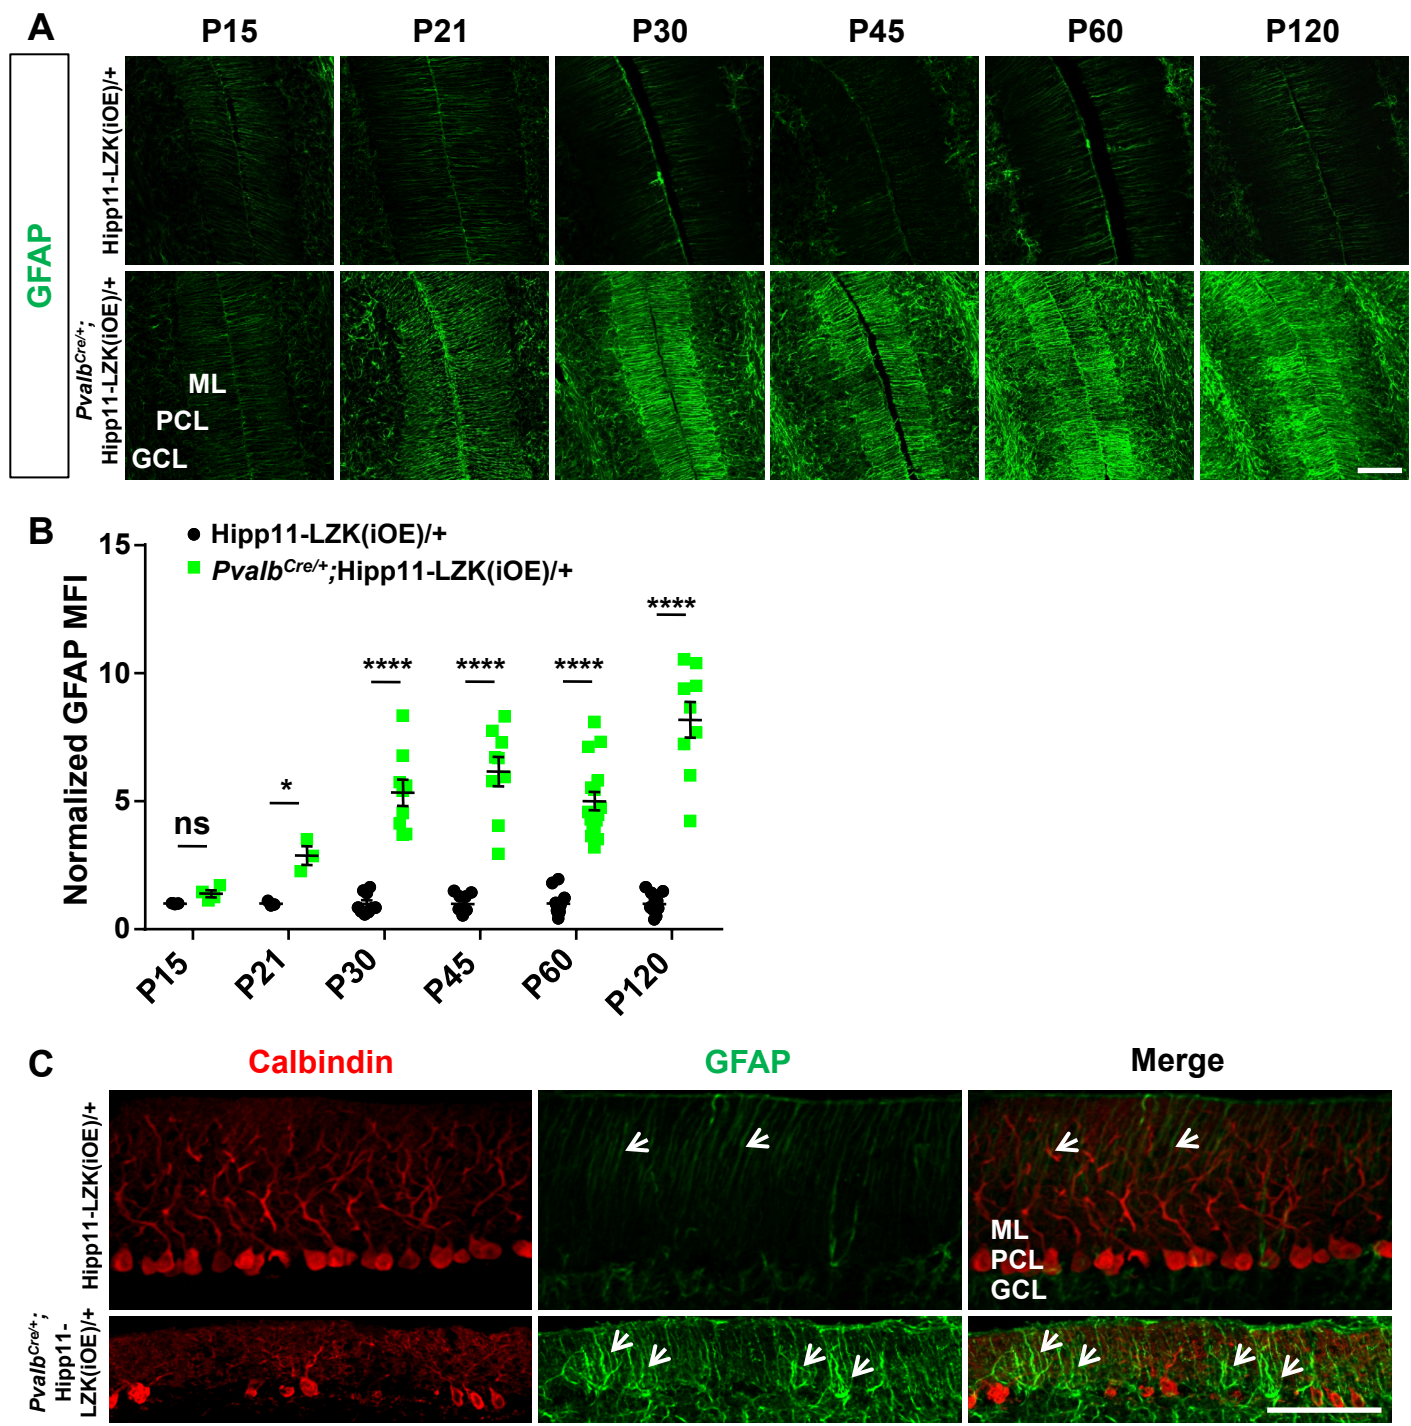

Supplement: supp [file elife-63509-supp-v1.zip]

**Figure 7-figure supplement 2**

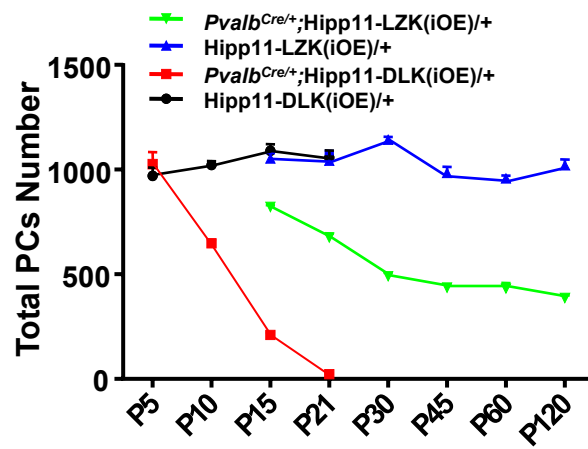

Supplement: supp [file elife-63509-supp-v1.zip]

Figure 3-figure supplement 3

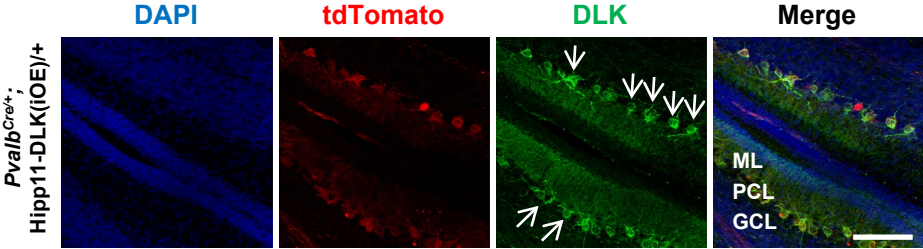

Supplement: supp [file elife-63509-supp-v1.zip]

Figure 7-figure supplement 1

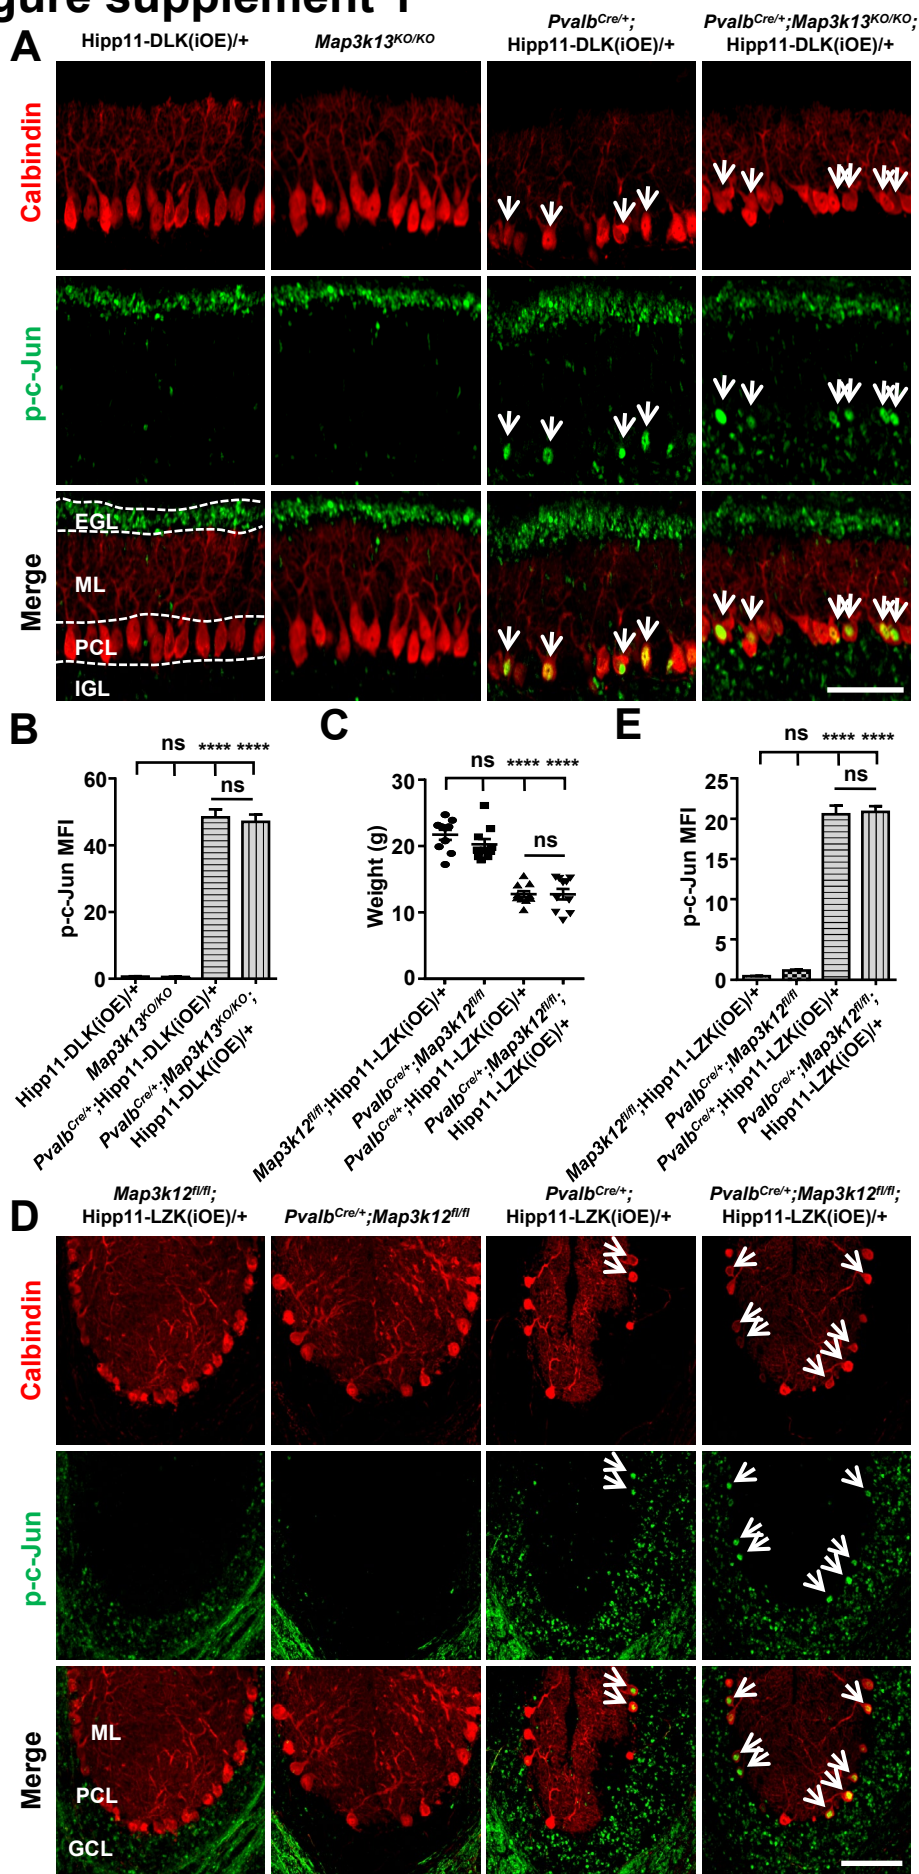

Supplement: supp [file elife-63509-supp-v1.zip]

Figure 4-figure supplement 3

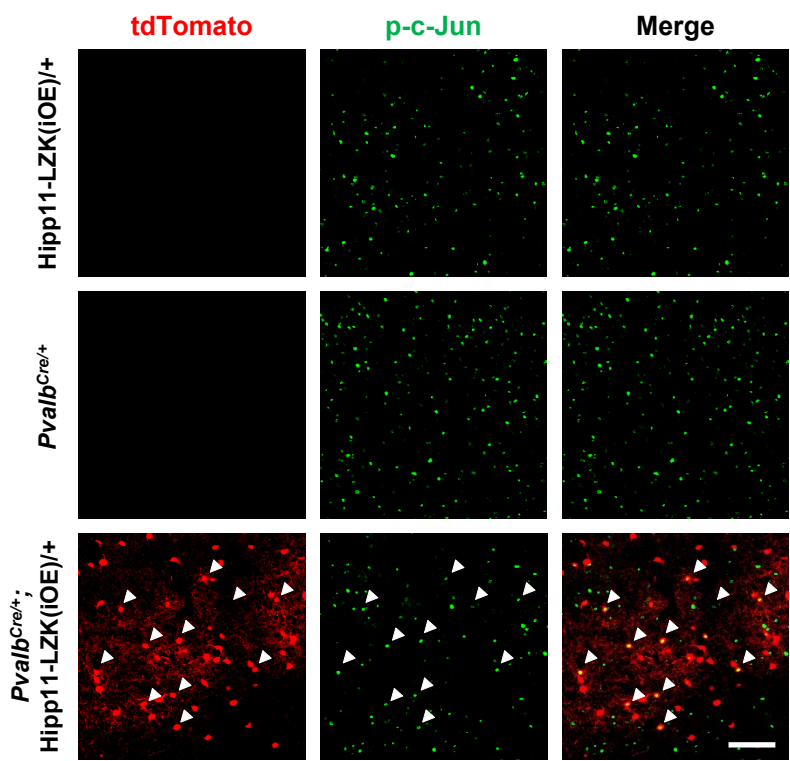

Supplement: supp [file elife-63509-supp-v1.zip]

Figure 3-figure supplement 1

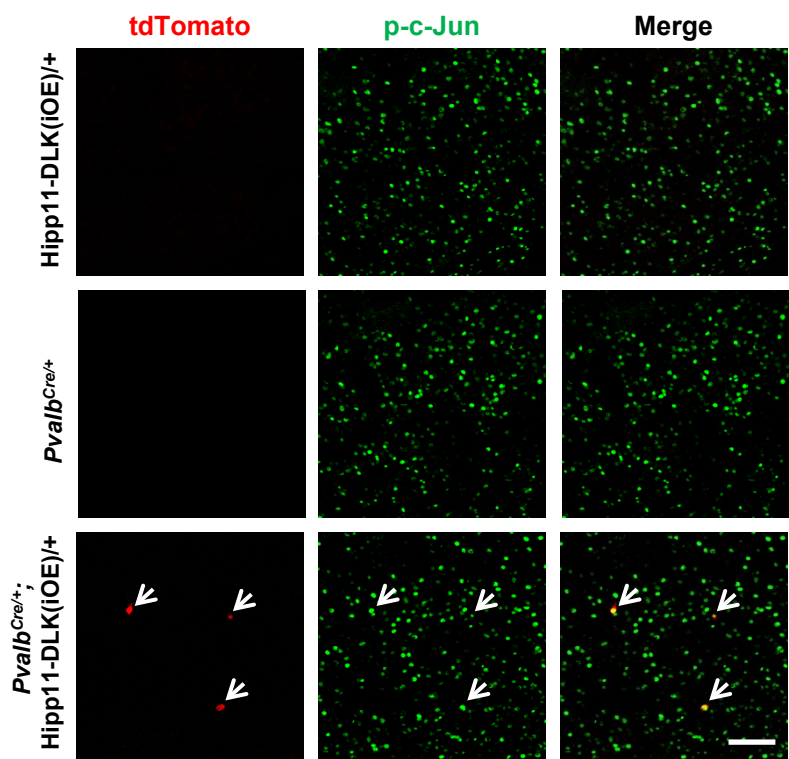

Supplement: supp [file elife-63509-supp-v1.zip]

# Figure 6-figure supplement 1

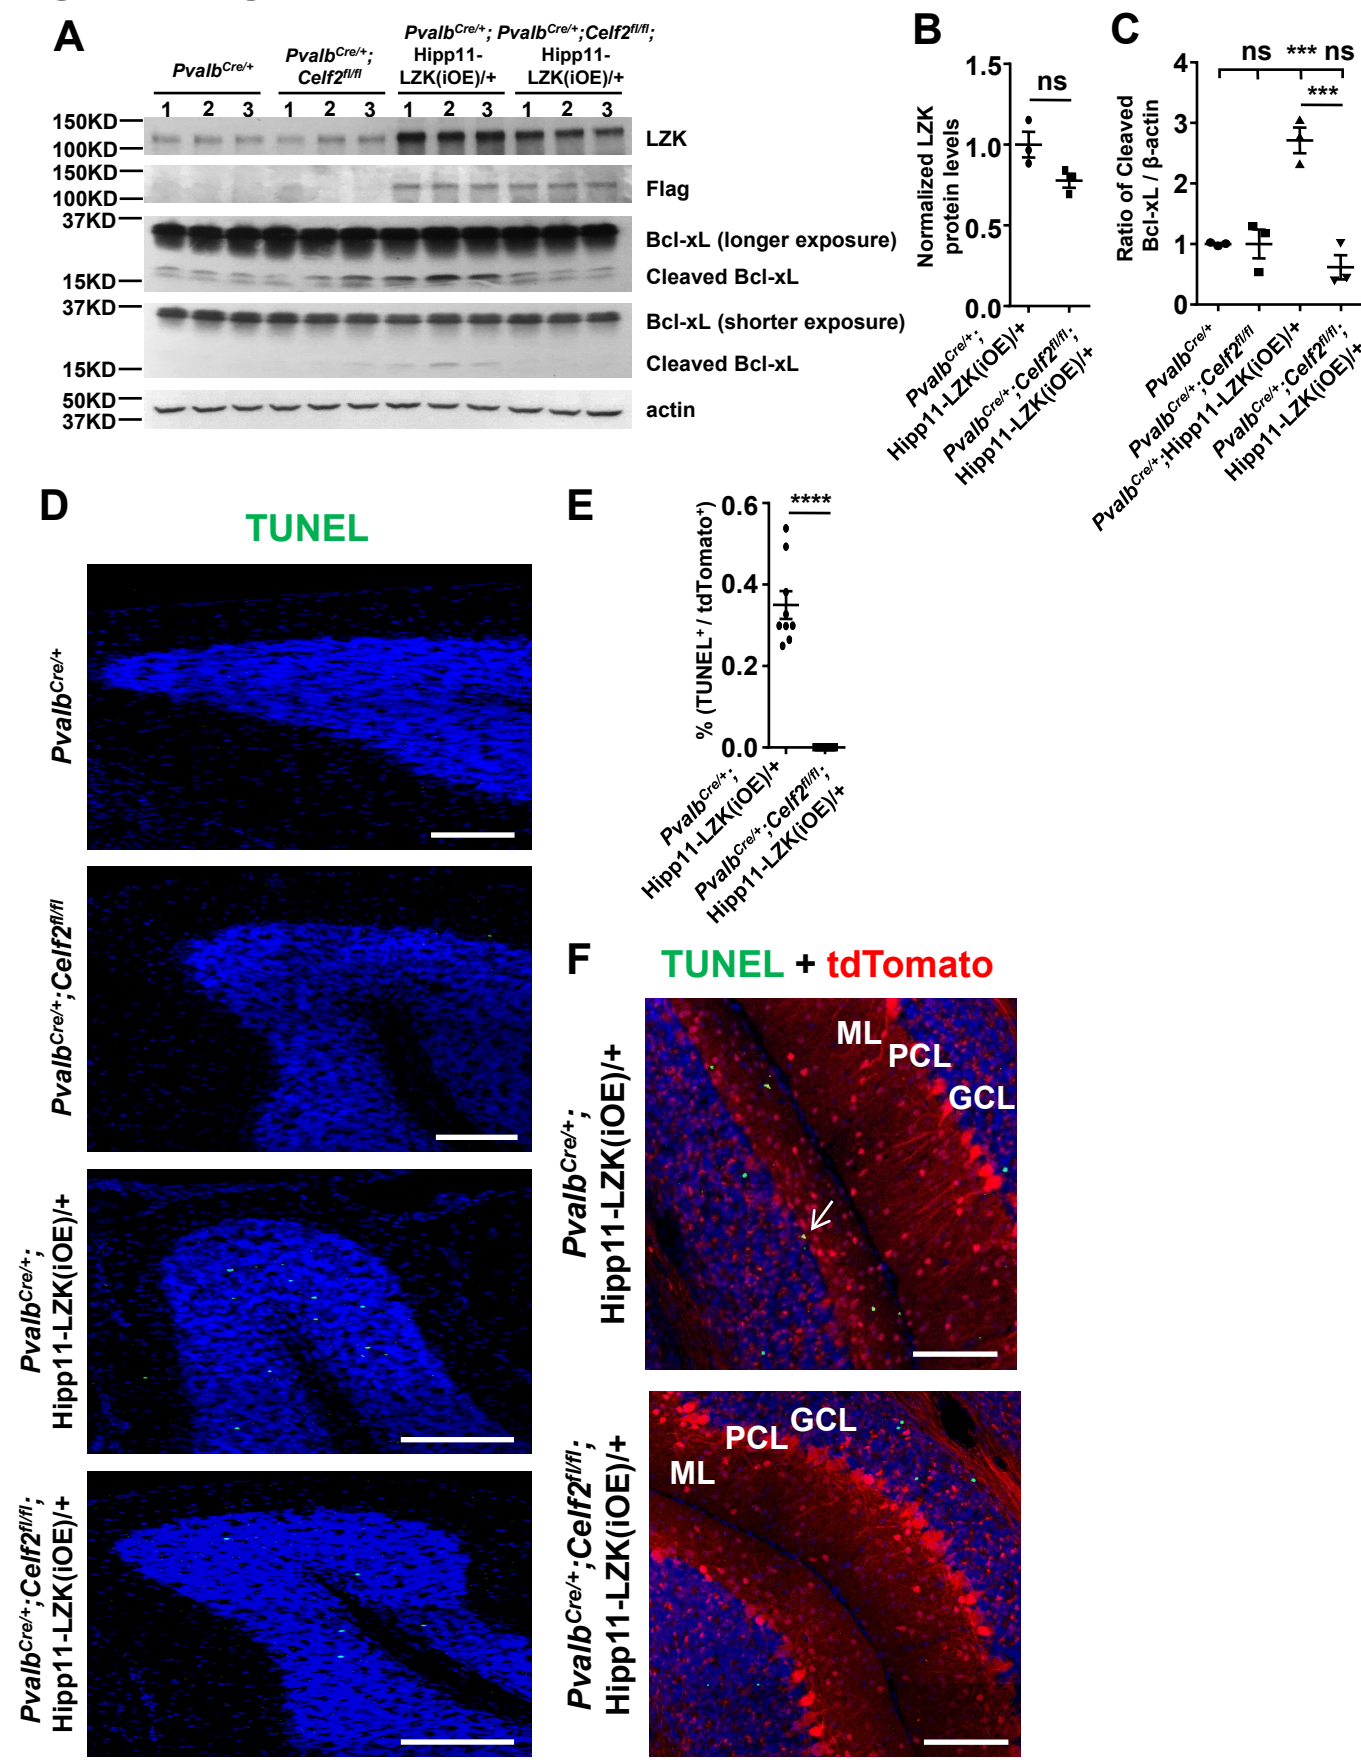

Supplement: supp [file elife-63509-supp-v1.zip]
